# Supplementary material for: Proteomic Changes in Paspalum fasciculatum Leaves Exposed to Cd Stress
Source: MDPI journal article supplement (doi:10.3390/plants11192455), 2022-09-20
Supplement: s1 [file s1]

**Table S2.** Physical and chemical characteristics of the soil from “El Alacrán” gold mine (n = 3).

| <b>Soil Properties</b>               |             |                |             |                                        |            |
|--------------------------------------|-------------|----------------|-------------|----------------------------------------|------------|
| <b>Properties of Bioavailability</b> |             | <b>Texture</b> |             | <b>Metals(mg kg<sup>-1</sup>) ± SD</b> |            |
| <b>pH</b>                            | 3.67 ± 0.03 | Sand (%)       | 27.5 ± 0.03 | Cd                                     | 7.27 ± 0.1 |
| <b>OM (%)</b>                        | 1.54 ± 0.09 | Clay (%)       | 4.4 ± 0.09  | Pb                                     | 2.72 ± 0.4 |
| <b>CEC</b>                           | 13.1 ± 0.01 | Silt (%)       | 68.1 ± 0.06 | Hg                                     | 0.5 ± 0.01 |
| <b>Ca/Mg</b>                         | 0.6 ± 0.02  | -              | -           | Ni                                     | 25.2 ± 0.5 |
| <b>Ca/K</b>                          | 2.5 ± 0.3   | -              | -           | Fe                                     | 13.1 ± 0.2 |
| <b>Mg/K</b>                          | 3.9 ± 0.03  | -              | -           | Mn                                     | 19.1 ± 0.7 |

OM (%): organic matter percentage; CEC: cation exchange capacity; Sand (%): sand percentage; Clay (%): clay percentage; Silt (%): silt percentage. Ca/Mg, Ca/K, Mg/K: Cation ratios.
