# Supplementary material for: Proteomic Changes in Paspalum fasciculatum Leaves Exposed to Cd Stress
Source: MDPI journal article supplement (doi:10.3390/plants11192455), 2022-09-20
Supplement: s1 [file s1]

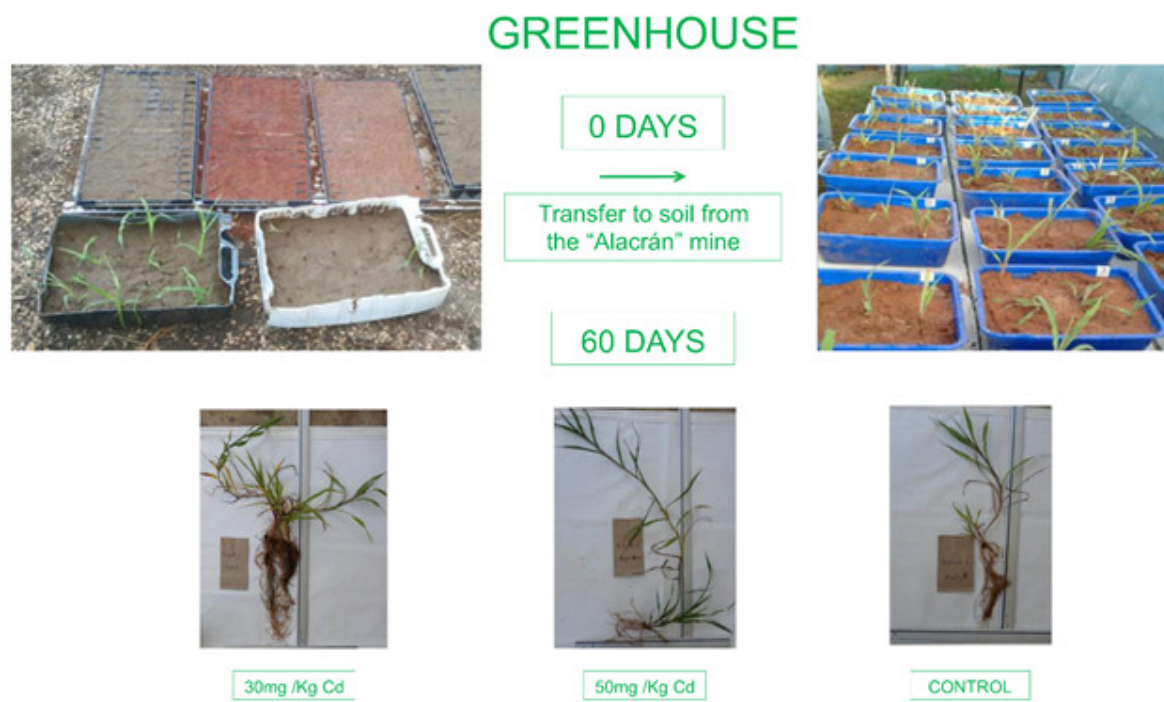

**Figure S1.** Reproduction by cuttings of *P. fasciculatum* plants in fertile soils and subsequent transplantation to mining soils supplemented with Cd during 60 days.
