# Supplementary material for: Proteomic Changes in Paspalum fasciculatum Leaves Exposed to Cd Stress
Source: Plants (Basel). 2022 Sep 20;11(19):2455. doi: 10.3390/plants11192455 (PMC9573290; doi:10.3390/plants11192455)
Supplement: Supplementary file 1 [file plants-11-02455-s001.zip › Table S1.xlsx]

## Sheet: UP,DOWN-REGULATE
Table S1. Dataset of differentially accumulated proteins in Paspalum fasciculatum leaves exposed to concentrations of 30 and 50 mg kg-1 of Cd in doped mining soils(n=3).
Accession	Description	Area Cd30/Area Control		Area Cd50/Area Control
A1E9T1	ATP synthase subunit beta, chloroplastic OS=Sorghum bicolor GN=atpB PE=3 SV=1	0.598281		0.501689
A1E9S1	ATP synthase subunit alpha, chloroplastic OS=Sorghum bicolor GN=atpA PE=3 SV=1	1.36568		1.08765
P19163	Ribulose bisphosphate carboxylase large chain OS=Neurachne munroi GN=rbcL PE=3 SV=1	1.09448		0.600979
Q332X1	ATP synthase subunit beta, chloroplastic OS=Lactuca sativa GN=atpB PE=3 SV=1	0.00098847		0.00098847
B0Z4U4	ATP synthase subunit beta, chloroplastic OS=Oenothera biennis GN=atpB PE=3 SV=1	1.21086		1.15135
A4GYR7	ATP synthase subunit beta, chloroplastic OS=Populus trichocarpa GN=atpB PE=3 SV=1	0.451614		8.47885e-05
Q01859	ATP synthase subunit beta, mitochondrial OS=Oryza sativa subsp. japonica GN=ATPB PE=1 SV=2	0.697343		0.471892
P17614	ATP synthase subunit beta, mitochondrial OS=Nicotiana plumbaginifolia GN=ATPB PE=1 SV=1	1.27538		0.000443108
A1E9V0	Photosystem II CP47 reaction center protein OS=Sorghum bicolor GN=psbB PE=3 SV=1	0.707621		0.678396
Q5Z974	ATP-dependent zinc metalloprotease FTSH 1, chloroplastic OS=Oryza sativa subsp. japonica GN=FTSH1 PE=2 SV=1	0.745453		0.257169
Q8SLY2	ATP synthase subunit beta, chloroplastic OS=Chaetosphaeridium globosum GN=atpB PE=3 SV=2	0.000485649		0.560394
A6H5I4	ATP synthase subunit beta, chloroplastic OS=Cycas taitungensis GN=atpB PE=3 SV=1	1.38898		0.0039971
Q40677	Fructose-bisphosphate aldolase, chloroplastic OS=Oryza sativa subsp. japonica GN=ALDP PE=1 SV=2	1.32121		1.02654
B1NWD5	ATP synthase subunit alpha, chloroplastic OS=Manihot esculenta GN=atpA PE=3 SV=1	1.28901		0.00429152
A1E9T7	Cytochrome f OS=Sorghum bicolor GN=petA PE=3 SV=1	1.05461		1.04198
P05037	ATP synthase subunit beta, chloroplastic OS=Pisum sativum GN=atpB PE=3 SV=1	0.0578925		0.0578925
P0C1M0	ATP synthase subunit gamma, chloroplastic OS=Zea mays PE=1 SV=1	1.40136		1.00944
A1E9R0	Photosystem II CP43 reaction center protein OS=Sorghum bicolor GN=psbC PE=3 SV=1	1.16288		1.17732
P46285	Sedoheptulose-1,7-bisphosphatase, chloroplastic OS=Triticum aestivum PE=2 SV=1	0.90794		0.631744
P43227	Ribulose bisphosphate carboxylase large chain (Fragment) OS=Cheiropleuria bicuspis GN=rbcL PE=3 SV=1	1.29525		0.389048
P0C520	ATP synthase subunit alpha, mitochondrial OS=Oryza sativa GN=ATPA PE=3 SV=1	1.26681		1.01158
Q655S1	ATP-dependent zinc metalloprotease FTSH 2, chloroplastic OS=Oryza sativa subsp. japonica GN=FTSH2 PE=3 SV=1	1.35416		1.76087
Q9STW6	Heat shock 70 kDa protein 6, chloroplastic OS=Arabidopsis thaliana GN=HSP70-6 PE=1 SV=1	1.49245		1.10707
P26302	Phosphoribulokinase, chloroplastic OS=Triticum aestivum PE=2 SV=1	0.979798		1.48737
Q0P3P2	ATP synthase subunit beta, chloroplastic OS=Ostreococcus tauri GN=atpB PE=3 SV=1	1.26446		11.3076
P36213	Photosystem I reaction center subunit II, chloroplastic OS=Hordeum vulgare GN=psaD PE=1 SV=1	0.799946		0.845187
Q37227	Ribulose bisphosphate carboxylase large chain (Fragment) OS=Iris germanica GN=rbcL PE=3 SV=2	0.00685573		0.00685573
O64422	Fructose-1,6-bisphosphatase, chloroplastic OS=Oryza sativa subsp. japonica GN=Os03g0267300 PE=2 SV=1	0.81815		0.276144
P93805	Phosphoglucomutase, cytoplasmic 2 OS=Zea mays PE=2 SV=2	0.709333		0.324524
Q42971	Enolase OS=Oryza sativa subsp. japonica GN=ENO1 PE=1 SV=2	2.87239		0.982369
P37833	Aspartate aminotransferase, cytoplasmic OS=Oryza sativa subsp. japonica GN=Os01g0760600 PE=2 SV=1	2.2935		2.1593
A1E9K3	Cytochrome f OS=Hordeum vulgare GN=petA PE=3 SV=1	0.0166408		0.0166408
A4GGA2	Photosystem II D2 protein OS=Phaseolus vulgaris GN=psbD PE=3 SV=1	1.03379		0.851668
P15280	Glucose-1-phosphate adenylyltransferase small subunit 2, chloroplastic/amyloplastic/cytosolic OS=Oryza sativa subsp. japonica GN=AGPS2 PE=1 SV=4	1.14961		0.750972
P93804	Phosphoglucomutase, cytoplasmic 1 OS=Zea mays PE=2 SV=2	1.52867		0.620511
P55238	Glucose-1-phosphate adenylyltransferase small subunit, chloroplastic/amyloplastic OS=Hordeum vulgare PE=2 SV=1	2.65127		2.03607
P42895	Enolase 2 OS=Zea mays GN=ENO2 PE=2 SV=1	0.0120635		0.0120635
Q7F9I1	Chaperone protein ClpC1, chloroplastic OS=Oryza sativa subsp. japonica GN=CLPC1 PE=2 SV=2	0.663961		1.53345
P27322	Heat shock cognate 70 kDa protein 2 OS=Solanum lycopersicum GN=HSC-2 PE=2 SV=1	722.008		343.959
Q7SIC9	Transketolase, chloroplastic OS=Zea mays PE=1 SV=1	1.33868		0.468545
P25828	Ribulose bisphosphate carboxylase large chain OS=Basella alba GN=rbcL PE=3 SV=1	202.081		1
Q7XTE8	14-3-3-like protein GF14-B OS=Oryza sativa subsp. japonica GN=GF14B PE=1 SV=2	2.03371		4.67701
P12857	ADP,ATP carrier protein 2, mitochondrial OS=Zea mays GN=ANT2 PE=2 SV=2	1.20416		0.744312
Q02028	Stromal 70 kDa heat shock-related protein, chloroplastic OS=Pisum sativum GN=HSP70 PE=2 SV=1	2.75668		0.00191277
Q9LHA8	Probable mediator of RNA polymerase II transcription subunit 37c OS=Arabidopsis thaliana GN=MED37C PE=1 SV=1	1.06248		0.00995611
Q2QVG9	Chaperone protein ClpC2, chloroplastic OS=Oryza sativa subsp. japonica GN=CLPC2 PE=2 SV=2	1.64394		0.737323
Q5Z5A8	Photosystem II stability/assembly factor HCF136, chloroplastic OS=Oryza sativa subsp. japonica GN=HCF136 PE=3 SV=1	1.45185		1.77417
Q43298	Chaperonin CPN60-2, mitochondrial OS=Zea mays GN=CPN60II PE=2 SV=1	1.0185		0.360484
P09672	Glyceraldehyde-3-phosphate dehydrogenase A, chloroplastic (Fragment) OS=Sinapis alba GN=GAPA PE=2 SV=1	2.06866		1.40002
P12783	Phosphoglycerate kinase, cytosolic OS=Triticum aestivum PE=2 SV=1	1.33298		0.907588
P09315	Glyceraldehyde-3-phosphate dehydrogenase A, chloroplastic OS=Zea mays GN=GAPA PE=2 SV=1	1.4998		1.35138
P26301	Enolase 1 OS=Zea mays GN=ENO1 PE=2 SV=1	1.12084		0.654241
A1E9J0	Photosystem I P700 chlorophyll a apoprotein A2 OS=Hordeum vulgare GN=psaB PE=3 SV=1	1.3556		2.22593
Q9ZT00	Ribulose bisphosphate carboxylase/oxygenase activase, chloroplastic OS=Zea mays GN=RCA1 PE=2 SV=3	2.15201		1.00007
Q40078	V-type proton ATPase subunit B 1 OS=Hordeum vulgare PE=2 SV=1	0.739253		0.491117
P23322	Oxygen-evolving enhancer protein 1, chloroplastic OS=Solanum lycopersicum GN=PSBO PE=2 SV=2	0.469163		2.12109
Q08080	Stromal 70 kDa heat shock-related protein, chloroplastic (Fragment) OS=Spinacia oleracea GN=CHSP70 PE=2 SV=1	1.47289		1.53677
P27774	Phosphoribulokinase, chloroplastic OS=Mesembryanthemum crystallinum PE=2 SV=1	0.552333		1.37306
P08440	Fructose-bisphosphate aldolase, cytoplasmic isozyme OS=Zea mays PE=2 SV=1	1.27329		0.458707
P24629	Heat shock cognate 70 kDa protein 1 OS=Solanum lycopersicum GN=HSC-I PE=2 SV=1	0.0076272		0.0076272
Q09054	Glyceraldehyde-3-phosphate dehydrogenase 2, cytosolic OS=Zea mays GN=GAPC2 PE=2 SV=1	0.42507		0.00369811
Q6Z7B0	Heat shock 70 kDa protein BIP1 OS=Oryza sativa subsp. japonica GN=BIP1 PE=1 SV=1	1.6002		0.0114849
P22954	Probable mediator of RNA polymerase II transcription subunit 37c OS=Arabidopsis thaliana GN=MED37D PE=1 SV=2	1.35135		1.17038
P08823	RuBisCO large subunit-binding protein subunit alpha, chloroplastic (Fragment) OS=Triticum aestivum PE=1 SV=1	0.85041		0.824934
P38562	Glutamine synthetase root isozyme 4 OS=Zea mays GN=GLN5 PE=2 SV=1	0.000471856		0.000471856
O80860	ATP-dependent zinc metalloprotease FTSH 2, chloroplastic OS=Arabidopsis thaliana GN=FTSH2 PE=1 SV=1	1.49712		0.952904
P12859	Glyceraldehyde-3-phosphate dehydrogenase B, chloroplastic OS=Pisum sativum GN=GAPB PE=2 SV=2	2.34547		1.65023
Q6ENW7	ATP synthase subunit b, chloroplastic OS=Saccharum officinarum GN=atpF PE=3 SV=1	1.2126		1.28627
Q9LRR9	Peroxisomal (S)-2-hydroxy-acid oxidase GLO1 OS=Arabidopsis thaliana GN=GLO1 PE=1 SV=1	1.408		1.1223
P42066	Phosphoenolpyruvate carboxykinase (ATP) OS=Cucumis sativus GN=PCK PE=2 SV=1	1.77614		0.248548
A1E9Q4	Photosystem II protein D1 OS=Sorghum bicolor GN=psbA PE=3 SV=1	1.78222		2.53065
B8B7C5	Peroxisomal (S)-2-hydroxy-acid oxidase GLO5 OS=Oryza sativa subsp. indica GN=GLO5 PE=3 SV=1	1.12119		1.66432
P49087	V-type proton ATPase catalytic subunit A (Fragment) OS=Zea mays PE=2 SV=1	0.881339		0.475492
P92549	ATP synthase subunit alpha, mitochondrial OS=Arabidopsis thaliana GN=ATPA PE=1 SV=2	1.37384		0.00132178
P80608	Cysteine synthase OS=Zea mays PE=1 SV=2	0.487964		0.579214
Q9ZP06	Malate dehydrogenase 1, mitochondrial OS=Arabidopsis thaliana GN=At1g53240 PE=1 SV=1	0.00301141		0.00301141
Q42962	Phosphoglycerate kinase, cytosolic OS=Nicotiana tabacum PE=2 SV=1	2.4159		1.54429
Q2QLY5	5-methyltetrahydropteroyltriglutamate--homocysteine methyltransferase 1 OS=Oryza sativa subsp. japonica GN=Os12g0623900 PE=2 SV=1	0.417925		0.000819283
P11155	Pyruvate, phosphate dikinase 1, chloroplastic OS=Zea mays GN=PPDK1 PE=1 SV=2	2.41598		1.20749
P38561	Glutamine synthetase root isozyme 3 OS=Zea mays GN=GLN4 PE=1 SV=1	1.20993		0.0140732
P23345	Superoxide dismutase [Cu-Zn] 4A OS=Zea mays GN=SODCC.3 PE=2 SV=2	0.378927		0.725676
A1E9Y0	NAD(P)H-quinone oxidoreductase subunit H, chloroplastic OS=Sorghum bicolor GN=ndhH PE=3 SV=1	3.94785		0.00087283
A2WKS5	Histone H2B.8 OS=Oryza sativa subsp. indica GN=H2B.8 PE=3 SV=1	0.559819		0.619417
Q75GT3	Chaperone protein ClpB2, chloroplastic OS=Oryza sativa subsp. japonica GN=CLPB2 PE=2 SV=1	1.00277		0.843834
Q41048	Oxygen-evolving enhancer protein 3-1, chloroplastic OS=Zea mays GN=PSBQ1 PE=2 SV=1	1.15694		2.17931
Q6Z2Z4	Eukaryotic initiation factor 4A-3 OS=Oryza sativa subsp. japonica GN=Os02g0146600 PE=1 SV=1	0.0207098		0.0207098
Q944G9	Fructose-bisphosphate aldolase 2, chloroplastic OS=Arabidopsis thaliana GN=FBA2 PE=1 SV=2	1.11612		0.7149
Q6ER94	2-Cys peroxiredoxin BAS1, chloroplastic OS=Oryza sativa subsp. japonica GN=BAS1 PE=1 SV=1	0.970669		1.2613
Q42961	Phosphoglycerate kinase, chloroplastic OS=Nicotiana tabacum PE=2 SV=1	0.000360831		0.345695
Q9LD57	Phosphoglycerate kinase 1, chloroplastic OS=Arabidopsis thaliana GN=PGK1 PE=1 SV=1	1		3970.84
Q43831	RuBisCO large subunit-binding protein subunit beta, chloroplastic (Fragment) OS=Secale cereale GN=CPN60 PE=2 SV=1	1.04616		0.702179
P53492	Actin-7 OS=Arabidopsis thaliana GN=ACT7 PE=1 SV=1	2.92269		0.00512105
Q43772	UTP--glucose-1-phosphate uridylyltransferase OS=Hordeum vulgare PE=2 SV=1	1.96643		0.804954
P53504	Actin-1 OS=Sorghum bicolor GN=AC1 PE=2 SV=1	3.78178		3.26692
P26517	Glyceraldehyde-3-phosphate dehydrogenase 1, cytosolic OS=Hordeum vulgare GN=GAPC PE=2 SV=1	0.000615631		0.000615631
Q6ZIV7	Hypersensitive-induced response protein 1 OS=Oryza sativa subsp. japonica GN=HIR1 PE=1 SV=1	1.00115		1.06356
O65107	Photosystem I reaction center subunit N, chloroplastic (Fragment) OS=Zea mays GN=PSAN PE=2 SV=1	1.2421		1.86838
P29409	Phosphoglycerate kinase, chloroplastic (Fragment) OS=Spinacia oleracea PE=2 SV=2	1.27203		0.789646
P31405	V-type proton ATPase catalytic subunit A OS=Gossypium hirsutum GN=CVA69.24 PE=2 SV=1	1.7646		0.00140006
Q6ZKC0	14-3-3-like protein GF14-C OS=Oryza sativa subsp. japonica GN=GF14C PE=1 SV=1	2.38795		2.67782
Q9BAE0	ATP-dependent zinc metalloprotease FTSH, chloroplastic OS=Medicago sativa GN=FTSH PE=2 SV=1	220.015		298.724
P26300	Enolase OS=Solanum lycopersicum GN=PGH1 PE=2 SV=1	1.79112		0.950407
P08735	Glyceraldehyde-3-phosphate dehydrogenase 1, cytosolic OS=Zea mays GN=GAPC1 PE=2 SV=2	2.27396		3.70874
Q08062	Malate dehydrogenase, cytoplasmic OS=Zea mays PE=1 SV=2	2.74874		1.09837
Q43843	Ribulose-phosphate 3-epimerase, chloroplastic (Fragment) OS=Solanum tuberosum PE=1 SV=1	0.828098		0.897832
P30173	Actin-101 OS=Solanum tuberosum GN=AC101 PE=3 SV=1	1.58881		1.75183
P11428	Superoxide dismutase [Cu-Zn] 2 OS=Zea mays GN=SODCC.1 PE=2 SV=2	0.359001		0.892346
A2XMV1	Glutamate dehydrogenase 1, mitochondrial OS=Oryza sativa subsp. indica GN=GDH1 PE=3 SV=2	1.92707		1.68704
Q69LA6	Probable pyridoxal 5'-phosphate synthase subunit PDX1.1 OS=Oryza sativa subsp. japonica GN=PDX11 PE=2 SV=1	1.04557		1.24773
P41344	Ferredoxin--NADP reductase, leaf isozyme, chloroplastic OS=Oryza sativa subsp. japonica GN=Os06g0107700 PE=2 SV=1	0.694321		0.616105
P08927	RuBisCO large subunit-binding protein subunit beta, chloroplastic OS=Pisum sativum PE=1 SV=2	6.66689		0.00639528
Q84J55	14-3-3-like protein GF14-A OS=Oryza sativa subsp. japonica GN=GF14A PE=2 SV=1	1.48347		2.71049
P62786	Histone H4 variant TH091 OS=Triticum aestivum PE=3 SV=2	0.581008		0.946439
P12329	Chlorophyll a-b binding protein 1, chloroplastic OS=Zea mays GN=CAB1 PE=3 SV=1	0.331703		0.429998
Q9SP07	14-3-3-like protein OS=Lilium longiflorum PE=2 SV=1	1.05698		4.3611
Q43247	Glyceraldehyde-3-phosphate dehydrogenase 3, cytosolic OS=Zea mays GN=GAPC3 PE=2 SV=1	0.833899		1.63705
Q43321	Enolase OS=Alnus glutinosa GN=PGH1 PE=2 SV=1	1.1632		0.469931
C0Z361	Chaperonin 60 subunit beta 3, chloroplastic OS=Arabidopsis thaliana GN=CPN60B3 PE=1 SV=1	0.00233829		0.00233829
P14830	Superoxide dismutase [Cu-Zn] 1 OS=Solanum lycopersicum GN=SODCC.1 PE=2 SV=2	0.782161		1.35218
Q8S0J7	Probable membrane-associated 30 kDa protein, chloroplastic OS=Oryza sativa subsp. japonica GN=Os01g0895100 PE=1 SV=1	0.726064		0.996186
A8Y9E3	NAD(P)H-quinone oxidoreductase subunit H, chloroplastic OS=Lolium perenne GN=ndhH PE=3 SV=1	1.30333		1.15008
P49105	Glucose-6-phosphate isomerase, cytosolic OS=Zea mays GN=PHI1 PE=2 SV=1	0.659823		0.490517
O65316	Actin OS=Mesostigma viride PE=3 SV=1	0.767627		1.25071
Q0J4P2	Heat shock protein 81-1 OS=Oryza sativa subsp. japonica GN=HSP81-1 PE=3 SV=2	0.933039		0.602088
Q6ENP6	Photosystem I iron-sulfur center OS=Saccharum officinarum GN=psaC PE=3 SV=3	1.41029		1.53131
A6YGB8	Photosystem II protein D1 OS=Pleurastrum terricola GN=psbA PE=3 SV=2	15713.3		16561.7
O24047	Malate dehydrogenase, cytoplasmic OS=Mesembryanthemum crystallinum GN=MDH PE=2 SV=1	0.00469173		0.00469173
P43188	Adenylate kinase, chloroplastic OS=Zea mays GN=ADK1 PE=1 SV=1	1.94225		2.28129
Q7XPY2	Plasma membrane ATPase OS=Oryza sativa subsp. japonica GN=Os04g0656100 PE=2 SV=1	1.31308		1.31857
Q6K439	Probable plastid-lipid-associated protein 2, chloroplastic OS=Oryza sativa subsp. japonica GN=PAP2 PE=2 SV=1	0.963173		0.965841
P43643	Elongation factor 1-alpha OS=Nicotiana tabacum PE=2 SV=1	2.85159		0.0032168
P12863	Triosephosphate isomerase, cytosolic OS=Zea mays PE=3 SV=3	0.306639		0.443269
Q9LSU3	Proteasome subunit alpha type-6 OS=Oryza sativa subsp. japonica GN=PAA1 PE=2 SV=1	2.44098		1.95389
A1E9S7	NAD(P)H-quinone oxidoreductase subunit J, chloroplastic OS=Sorghum bicolor GN=ndhJ PE=3 SV=1	0.68677		0.546456
Q01516	Fructose-bisphosphate aldolase 1, chloroplastic (Fragment) OS=Pisum sativum PE=1 SV=1	0.0533533		0.0533533
Q40281	Ribulose bisphosphate carboxylase/oxygenase activase, chloroplastic OS=Malus domestica GN=RCA PE=2 SV=1	1.22518		0.864828
P21569	Peptidyl-prolyl cis-trans isomerase OS=Zea mays GN=CYP PE=2 SV=1	0.610707		0.708886
P12372	Photosystem I reaction center subunit II, chloroplastic OS=Solanum lycopersicum GN=psaD PE=2 SV=1	1.0135		1.06596
Q6Z0I4	Enoyl-[acyl-carrier-protein] reductase [NADH] 1, chloroplastic OS=Oryza sativa subsp. japonica GN=Os08g0327400 PE=2 SV=1	0.529148		0.447286
P27080	ADP,ATP carrier protein OS=Chlamydomonas reinhardtii GN=ABT PE=2 SV=1	1		65.5311
Q9XFA2	Phosphoenolpyruvate carboxykinase (ATP) 2 OS=Urochloa panicoides GN=PCK2 PE=2 SV=1	0.596583		0.00150085
A4QJC8	Cytochrome f OS=Aethionema cordifolium GN=petA PE=3 SV=1	0.716483		0.463048
Q9LSU1	Proteasome subunit alpha type-5 OS=Oryza sativa subsp. japonica GN=PAE1 PE=2 SV=1	0.661351		1.04645
B3TNA5	NAD(P)H-quinone oxidoreductase subunit H, chloroplastic OS=Brachypodium distachyon GN=ndhH PE=3 SV=1	0.00607145		0.00607145
Q43261	Histone H2B.3 OS=Zea mays PE=3 SV=3	0.847287		1.29028
Q43433	V-type proton ATPase subunit B 2 (Fragment) OS=Gossypium hirsutum PE=2 SV=1	1.03702		1.31147
Q6ZC69	Probable adenylate kinase 2, chloroplastic OS=Oryza sativa subsp. japonica GN=Os08g0109300 PE=2 SV=1	0.233845		2.59923
Q69SV0	Probable L-ascorbate peroxidase 8, chloroplastic OS=Oryza sativa subsp. japonica GN=APX8 PE=1 SV=2	0.817616		0.00311901
P49398	40S ribosomal protein S4 OS=Oryza sativa subsp. japonica GN=RPS4 PE=2 SV=3	0.981684		0.796074
A2Y053	S-adenosylmethionine synthase 1 OS=Oryza sativa subsp. indica GN=SAM1 PE=2 SV=2	2.21098		0.00339142
P0C5D5	Peroxiredoxin Q, chloroplastic OS=Oryza sativa subsp. japonica GN=Os06g0196300 PE=2 SV=1	0.763114		1.21092
Q40073	Ribulose bisphosphate carboxylase/oxygenase activase A, chloroplastic OS=Hordeum vulgare GN=RCAA PE=2 SV=1	0.670299		0.363607
Q2R2W2	14-3-3-like protein GF14-D OS=Oryza sativa subsp. japonica GN=GF14D PE=1 SV=1	6.53885		5.29249
O64981	Ribulose bisphosphate carboxylase/oxygenase activase, chloroplastic OS=Phaseolus vulgaris GN=RCA1 PE=2 SV=1	0.628267		1.73115
Q6YZX6	Putative aconitate hydratase, cytoplasmic OS=Oryza sativa subsp. japonica GN=Os08g0191100 PE=3 SV=1	2.73431		0.0119505
P93407	Superoxide dismutase [Cu-Zn], chloroplastic OS=Oryza sativa subsp. japonica GN=SODCP PE=1 SV=1	0.381593		1.10249
Q35322	NADH dehydrogenase [ubiquinone] iron-sulfur protein 3 OS=Oryza sativa subsp. japonica GN=NAD9 PE=2 SV=2	0.626775		0.779712
P27081	ADP,ATP carrier protein, mitochondrial (Fragment) OS=Solanum tuberosum GN=ANT1 PE=2 SV=1	1		171.024
P20904	Actin OS=Volvox carteri PE=3 SV=1	2.66133		7.8905
P52588	Protein disulfide-isomerase OS=Zea mays GN=PDI PE=2 SV=1	0.665348		0.581275
Q08480	Adenylate kinase 4 OS=Oryza sativa subsp. japonica GN=ADK-B PE=2 SV=1	0.481712		0.534655
O49079	Oxygen-evolving enhancer protein 1, chloroplastic OS=Fritillaria agrestis GN=PSBO PE=2 SV=1	0.810954		0.321661
P19950	40S ribosomal protein S14 OS=Zea mays PE=3 SV=1	0.898545		1.56903
P41346	Ferredoxin--NADP reductase, chloroplastic OS=Vicia faba GN=PETH PE=2 SV=1	0.684352		0.604072
Q69S39	Cytochrome b6-f complex iron-sulfur subunit, chloroplastic OS=Oryza sativa subsp. japonica GN=petC PE=1 SV=1	0.529915		0.582508
Q9ZTP5	Ribulose-phosphate 3-epimerase, chloroplastic OS=Oryza sativa subsp. japonica GN=RPE PE=1 SV=2	0.679005		0.00339787
Q9T074	Phosphoenolpyruvate carboxykinase (ATP) OS=Arabidopsis thaliana GN=PCKA PE=1 SV=1	0.806783		0.632211
O22424	40S ribosomal protein S4 OS=Zea mays GN=RPS4 PE=2 SV=1	0.00157388		0.656601
P15252	Rubber elongation factor protein OS=Hevea brasiliensis PE=1 SV=2	1.25757		1.38562
Q05761	40S ribosomal protein S13 OS=Zea mays GN=RPS13 PE=2 SV=1	0.415495		1.28391
Q43206	Catalase-1 OS=Triticum aestivum GN=CAT1 PE=2 SV=1	0.795399		0.609636
P14655	Glutamine synthetase, chloroplastic OS=Oryza sativa subsp. japonica GN=GLN2 PE=1 SV=1	217.72		1
P0C355	Photosystem I P700 chlorophyll a apoprotein A1 OS=Oryza sativa subsp. japonica GN=psaA PE=3 SV=1	2.45444		2.39336
Q6K9N6	Succinate--CoA ligase [ADP-forming] subunit beta, mitochondrial OS=Oryza sativa subsp. japonica GN=Os02g0621700 PE=1 SV=1	1.32033		0.908027
A2WXV8	Fructokinase-1 OS=Oryza sativa subsp. indica GN=FRK1 PE=1 SV=1	0.727725		0.764481
P15194	Chlorophyll a-b binding protein type 2 member 1B, chloroplastic OS=Pinus sylvestris PE=2 SV=1	0.000214679		0.000214679
Q9LI00	6-phosphogluconate dehydrogenase, decarboxylating 1 OS=Oryza sativa subsp. japonica GN=G6PGH1 PE=2 SV=1	1.00135		0.631809
P18123	Catalase isozyme 3 OS=Zea mays GN=CAT3 PE=2 SV=2	0.490693		0.201847
P46722	NAD(P)H-quinone oxidoreductase subunit I, chloroplastic OS=Zea mays GN=ndhI PE=3 SV=1	0.00101061		0.00101061
Q6ZL94	Succinate--CoA ligase [ADP-forming] subunit alpha, mitochondrial OS=Oryza sativa subsp. japonica GN=Os07g0577700 PE=1 SV=1	1.86301		0.817593
Q10KF0	Proteasome subunit alpha type-2 OS=Oryza sativa subsp. japonica GN=PAB1 PE=2 SV=1	0.762838		1.26956
P25076	Cytochrome c1-1, heme protein, mitochondrial OS=Solanum tuberosum GN=CYCL PE=2 SV=1	0.529007		1.02544
Q6AVT2	Glucose-1-phosphate adenylyltransferase large subunit 1, chloroplastic/amyloplastic OS=Oryza sativa subsp. japonica GN=AGPL1 PE=1 SV=1	2.10936		0.00312169
Q6ATY4	UPF0603 protein Os05g0401100, chloroplastic OS=Oryza sativa subsp. japonica GN=Os05g0401100 PE=3 SV=1	0.411654		0.741212
A2XJ35	Chlorophyll a-b binding protein, chloroplastic OS=Oryza sativa subsp. indica GN=OsI_012078 PE=2 SV=1	1.07414		1.70181
P25462	Glutamine synthetase, chloroplastic OS=Zea mays GN=GLN2 PE=2 SV=1	1.61454		1.20867
P00412	Cytochrome c oxidase subunit 2 OS=Zea mays GN=COX2 PE=2 SV=4	0.824511		1.3824
P18492	Glutamate-1-semialdehyde 2,1-aminomutase, chloroplastic OS=Hordeum vulgare GN=GSA PE=1 SV=3	2.5705		0.0103234
Q32RQ1	Ribulose bisphosphate carboxylase large chain OS=Zygnema circumcarinatum GN=rbcL PE=3 SV=1	0.000138976		0.000138976
P50300	S-adenosylmethionine synthase OS=Pinus banksiana GN=METK PE=2 SV=1	1132.1		1005.52
P51821	ADP-ribosylation factor 1 OS=Chlamydomonas reinhardtii GN=ARF1 PE=2 SV=2	1.33545		1.76256
P12332	Chlorophyll a-b binding protein, chloroplastic (Fragment) OS=Silene latifolia subsp. alba PE=2 SV=2	0.00186294		0.00186294
P41980	Superoxide dismutase [Mn] 3.4, mitochondrial OS=Zea mays GN=SODA.3 PE=2 SV=1	0.839753		1.16688
O23813	Sulfite reductase [ferredoxin], chloroplastic OS=Zea mays GN=SIR PE=1 SV=1	0.0503514		0.000171923
A0A365	Cytochrome b6 OS=Coffea arabica GN=petB PE=3 SV=1	0.659868		0.616098
A2XIK9	Magnesium-chelatase subunit ChlI, chloroplastic OS=Oryza sativa subsp. indica GN=CHLI PE=3 SV=1	0.836069		0.832469
Q2QM69	2-methyl-6-phytyl-1,4-hydroquinone methyltransferase 2, chloroplastic OS=Oryza sativa subsp. japonica GN=Os12g0615400 PE=2 SV=2	2.39309		1.13298
A5H8G4	Peroxidase 1 OS=Zea mays GN=PER1 PE=1 SV=1	4.56642		5.12009
O22518	40S ribosomal protein SA OS=Glycine max PE=2 SV=1	1.31868		1.49419
Q9C9W5	Glycerate dehydrogenase HPR, peroxisomal OS=Arabidopsis thaliana GN=HPR PE=1 SV=1	1.23649		0.735296
P34823	Elongation factor 1-alpha OS=Daucus carota PE=2 SV=1	2.92348		0.0104746
P40978	40S ribosomal protein S19 OS=Oryza sativa subsp. japonica GN=RPS19A PE=2 SV=1	0.821554		1.23235
P38559	Glutamine synthetase root isozyme 1 OS=Zea mays GN=GLN6 PE=2 SV=1	0.00987853		0.00987853
Q9FHQ6	Polyubiquitin 9 OS=Arabidopsis thaliana GN=UBQ9 PE=3 SV=1	0.952087		1.42744
O81154	Cysteine synthase OS=Solanum tuberosum PE=2 SV=1	0.00677057		0.00677057
P0C341	NAD(P)H-quinone oxidoreductase subunit K, chloroplastic OS=Oryza sativa GN=ndhK PE=3 SV=2	0.754511		0.761628
O24573	60S acidic ribosomal protein P0 OS=Zea mays GN=RP-P0 PE=1 SV=3	0.829018		1.03365
A8Y9C3	50S ribosomal protein L14, chloroplastic OS=Lolium perenne GN=rpl14 PE=3 SV=1	0.976951		1.21163
Q9SQL2	Chlorophyll a-b binding protein P4, chloroplastic OS=Pisum sativum GN=lhcA-P4 PE=1 SV=1	0.000581434		0.180968
Q8LK61	NADP-dependent glyceraldehyde-3-phosphate dehydrogenase OS=Triticum aestivum GN=GAPN PE=1 SV=2	1.958		0.00452046
Q8LAH8	Nucleoside diphosphate kinase IV, chloroplastic/mitochondrial OS=Arabidopsis thaliana GN=NDK4 PE=1 SV=2	1.08216		2.73587
P93306	NADH dehydrogenase [ubiquinone] iron-sulfur protein 2 OS=Arabidopsis thaliana GN=NAD7 PE=1 SV=2	1.82692		0.544238
P84209	Malate dehydrogenase, mitochondrial (Fragments) OS=Imperata cylindrica PE=1 SV=1	0.387232		0.000774477
Q01899	Heat shock 70 kDa protein, mitochondrial OS=Phaseolus vulgaris PE=2 SV=1	3.62539		0.00127353
A2YXU2	Proteasome subunit alpha type-7-A OS=Oryza sativa subsp. indica GN=OsI_029135 PE=2 SV=2	0.00650391		1.62665
Q41738	Thiamine thiazole synthase 1, chloroplastic OS=Zea mays GN=THI1-1 PE=2 SV=1	0.684855		3.19298
O65731	40S ribosomal protein S5 (Fragment) OS=Cicer arietinum GN=RPS5 PE=2 SV=1	0.735279		0.679374
Q6XZ79	Fructokinase-1 OS=Zea mays GN=FRK1 PE=1 SV=1	0.232926		1.17163
O48556	Soluble inorganic pyrophosphatase OS=Zea mays GN=IPP PE=2 SV=1	0.00481303		1.19352
A3BLC3	Ribosome-recycling factor, chloroplastic OS=Oryza sativa subsp. japonica GN=Os07g0570700 PE=2 SV=2	0.980836		1.27124
P26518	Glyceraldehyde-3-phosphate dehydrogenase, cytosolic OS=Magnolia liliiflora GN=GAPC PE=2 SV=1	2.60327		0.00279933
P40393	Ras-related protein RIC2 OS=Oryza sativa subsp. japonica GN=RIC2 PE=2 SV=2	0.857161		2.25287
O22609	Protease Do-like 1, chloroplastic OS=Arabidopsis thaliana GN=DEGP1 PE=1 SV=2	0.882962		0.00183292
Q43272	NADP-dependent glyceraldehyde-3-phosphate dehydrogenase OS=Zea mays GN=GPN1 PE=2 SV=1	2.14648		0.00478345
P04782	Chlorophyll a-b binding protein 25, chloroplastic OS=Petunia sp. GN=CAB25 PE=3 SV=1	0.00311377		0.00311377
P51427	40S ribosomal protein S5-2 OS=Arabidopsis thaliana GN=RPS5B PE=1 SV=2	0.000764928		0.000764928
A7Y3F5	Cytochrome f OS=Ipomoea purpurea GN=petA PE=3 SV=1	0.00213952		0.00213952
Q6Z965	12-oxophytodienoate reductase 7 OS=Oryza sativa subsp. japonica GN=OPR7 PE=2 SV=1	1.11887		0.00658131
Q00914	Photosystem I iron-sulfur center OS=Chlamydomonas reinhardtii GN=psaC PE=1 SV=2	1.05858		0.857491
Q6ZBZ2	Germin-like protein 8-14 OS=Oryza sativa subsp. japonica GN=GER5 PE=1 SV=1	0.661679		1.35956
P17606	Malate dehydrogenase [NADP] 1, chloroplastic OS=Sorghum bicolor PE=1 SV=1	1.05484		0.00366272
P49690	60S ribosomal protein L23 OS=Arabidopsis thaliana GN=RPL23A PE=2 SV=3	0.227897		0.00136073
O23979	Soluble inorganic pyrophosphatase OS=Hordeum vulgare subsp. vulgare GN=IPP PE=2 SV=1	0.928155		0.00111785
A1E9V3	Photosystem II reaction center protein H OS=Sorghum bicolor GN=psbH PE=3 SV=1	0.843626		0.97241
Q05737	GTP-binding protein YPTM2 OS=Zea mays GN=YPTM2 PE=2 SV=1	73.6671		186.459
Q9SRZ6	Cytosolic isocitrate dehydrogenase [NADP] OS=Arabidopsis thaliana GN=CICDH PE=2 SV=1	1.46462		0.492324
Q6K548	Mitochondrial outer membrane protein porin 1 OS=Oryza sativa subsp. japonica GN=VDAC1 PE=1 SV=3	1.78788		0.00167741
Q6QPJ6	Peroxiredoxin Q, chloroplastic OS=Populus jackii GN=PRXQ PE=1 SV=1	0.00590848		0.00590848
Q6H6D2	Porphobilinogen deaminase, chloroplastic OS=Oryza sativa subsp. japonica GN=HEMC PE=2 SV=1	1.0904		1.33325
Q7F8S5	Peroxiredoxin-2E-2, chloroplastic OS=Oryza sativa subsp. japonica GN=PRXIIE-2 PE=1 SV=1	1.24134		1.47391
O23877	Ferredoxin--NADP reductase, embryo isozyme, chloroplastic OS=Oryza sativa subsp. japonica GN=Os07g0147900 PE=1 SV=1	0.798535		0.00497103
Q6ZFU6	Thioredoxin reductase NTRB OS=Oryza sativa subsp. japonica GN=NTRB PE=2 SV=1	1.4663		0.00383751
P92963	Ras-related protein RABB1c OS=Arabidopsis thaliana GN=RABB1C PE=1 SV=1	1.01955		2.28619
P27489	Chlorophyll a-b binding protein 13, chloroplastic OS=Solanum lycopersicum GN=CAB13 PE=1 SV=1	1.11635		1.36029
Q7XPL2	Oxygen-dependent coproporphyrinogen-III oxidase, chloroplastic OS=Oryza sativa subsp. japonica GN=CPX PE=2 SV=2	1.17877		0.727822
P49210	60S ribosomal protein L9 OS=Oryza sativa subsp. japonica GN=RPL9 PE=2 SV=3	0.509516		0.913921
P69390	Cytochrome b559 subunit alpha OS=Hordeum vulgare GN=psbE PE=1 SV=2	0.0674929		0.166576
P46225	Triosephosphate isomerase, chloroplastic OS=Secale cereale PE=1 SV=1	0.522805		0.465308
A6N0M9	Nucleoside diphosphate kinase 1 OS=Oryza sativa subsp. indica GN=NDKR PE=1 SV=1	0.645169		0.291042
Q9LSU0	Proteasome subunit alpha type-3 OS=Oryza sativa subsp. japonica GN=PAG1 PE=2 SV=1	0.92227		1.84314
Q9SMB1	Spermidine synthase 1 OS=Oryza sativa subsp. japonica GN=SPDSYN1 PE=2 SV=1	3.59472		2.44797
P49104	Ras-related protein Rab-2-B OS=Zea mays GN=RAB2B PE=2 SV=1	87.3079		158.665
B7F845	60S ribosomal protein L10a OS=Oryza sativa subsp. japonica GN=RPL10A PE=1 SV=1	0.00376504		0.00376504
Q9LD61	Aspartate carbamoyltransferase, chloroplastic OS=Oryza sativa subsp. japonica GN=PYRB PE=2 SV=1	1.70952		2.33104
A1EA14	ATP synthase epsilon chain, chloroplastic OS=Agrostis stolonifera GN=atpE PE=3 SV=1	1.34876		2.12717
P81664	Phosphoribulokinase (Fragments) OS=Pinus pinaster PE=1 SV=1	0.724884		0.726823
P00070	Cytochrome c OS=Helianthus annuus GN=CYTC1 PE=1 SV=3	1.3433		1.61259
P02582	Actin-1 OS=Zea mays GN=ACT1 PE=3 SV=1	340.432		608.18
Q40787	Ras-related protein Rab7 OS=Cenchrus ciliaris PE=2 SV=1	1.68197		1.43519
P29036	Ferritin-1, chloroplastic OS=Zea mays GN=FER1 PE=1 SV=2	3.28444		1.28355
P13192	Photosystem I reaction center subunit III, chloroplastic OS=Hordeum vulgare GN=PSAF PE=1 SV=2	0.403031		0.586117
A2Z3I9	Proteasome subunit alpha type-7-B OS=Oryza sativa subsp. indica GN=PAD1 PE=2 SV=1	1.87636		1.7351
A2Y7R5	GTP-binding nuclear protein Ran-2 OS=Oryza sativa subsp. indica GN=RAN2 PE=2 SV=1	1.96462		1.01691
Q9FE01	L-ascorbate peroxidase 2, cytosolic OS=Oryza sativa subsp. japonica GN=APX2 PE=1 SV=1	0.772829		0.373723
O81372	Nucleoside diphosphate kinase 1 OS=Mesembryanthemum crystallinum GN=NDKP1 PE=2 SV=1	0.596996		0.554785
P00056	Cytochrome c OS=Zea mays PE=1 SV=1	1.97532		0.00108745
Q53LQ0	Protein disulfide isomerase-like 1-1 OS=Oryza sativa subsp. japonica GN=PDIL1-1 PE=2 SV=1	1.49951		0.526779
Q9AQU5	Aquaporin PIP1-3/PIP1-4 OS=Zea mays GN=PIP1-3 PE=2 SV=1	1.18714		1.53911
P0DKK8	40S ribosomal protein S10-1 OS=Oryza sativa subsp. japonica GN=RPS10-1 PE=2 SV=1	0.539533		0.00249328
Q6Z1G7	Pyruvate dehydrogenase E1 component subunit beta-1, mitochondrial OS=Oryza sativa subsp. japonica GN=Os08g0536000 PE=2 SV=1	462.748		1
Q75IM9	Isovaleryl-CoA dehydrogenase, mitochondrial OS=Oryza sativa subsp. japonica GN=Os05g0125500 PE=2 SV=2	1.20537		1.08819
P27777	16.9 kDa class I heat shock protein 1 OS=Oryza sativa subsp. japonica GN=HSP16.9A PE=1 SV=1	2.87867		0.398463
P0C8Y9	Proteasome subunit alpha type-4-2 OS=Oryza sativa subsp. indica GN=OsI_021067 PE=1 SV=1	0.636131		0.723708
P40392	Ras-related protein RIC1 OS=Oryza sativa subsp. japonica GN=RIC1 PE=2 SV=2	0.00467602		0.00467602
Q9SDL8	Fructose-1,6-bisphosphatase, cytosolic OS=Oryza coarctata PE=2 SV=1	2.39494		1.50695
P12328	Chlorophyll a-b binding protein of LHCII type I, chloroplastic OS=Lemna gibba PE=3 SV=1	0.000168076		0.000168076
Q6ZFT5	Ribose-phosphate pyrophosphokinase 4 OS=Oryza sativa subsp. japonica GN=Os02g0714600 PE=2 SV=1	2.12014		0.0102657
O48557	60S ribosomal protein L17 OS=Zea mays GN=RPL17 PE=2 SV=1	0.0117003		0.0117003
Q9FZ48	Ubiquitin-conjugating enzyme E2 36 OS=Arabidopsis thaliana GN=UBC36 PE=1 SV=1	1.2393		2.16901
O65101	Photosystem I reaction center subunit VI, chloroplastic OS=Zea mays GN=PSAH PE=2 SV=1	0.71236		0.635666
P36886	Photosystem I reaction center subunit psaK, chloroplastic OS=Hordeum vulgare GN=PSAK PE=1 SV=1	1.47513		1.61934
Q9S829	NAD(P)H-quinone oxidoreductase subunit O, chloroplastic OS=Arabidopsis thaliana GN=ndhO PE=2 SV=1	0.91159		1.15787
P93258	Superoxide dismutase [Cu-Zn] 1 OS=Mesembryanthemum crystallinum GN=SODCC.1 PE=2 SV=1	1.21763		0.617782
P34924	Glyceraldehyde-3-phosphate dehydrogenase, cytosolic OS=Pinus sylvestris GN=GAPC PE=2 SV=1	2.21819		0.0114186
P28186	Ras-related protein RABE1c OS=Arabidopsis thaliana GN=RABE1C PE=1 SV=1	0.00687562		3.09124
Q9SIP7	40S ribosomal protein S3-1 OS=Arabidopsis thaliana GN=RPS3A PE=1 SV=1	0.866883		1.25238
Q6ESF0	Germin-like protein 2-4 OS=Oryza sativa subsp. japonica GN=Os02g0532500 PE=2 SV=1	0.795235		1.13171
P93554	Nucleoside diphosphate kinase 1 OS=Saccharum officinarum GN=NDPK1 PE=1 SV=1	1.15575		1.42814
Q07760	60S ribosomal protein L23 OS=Nicotiana tabacum GN=RPL23 PE=2 SV=1	0.00936689		0.00936689
A2XID3	Allene oxide cyclase, chloroplastic OS=Oryza sativa subsp. indica GN=AOC PE=2 SV=1	1.44423		0.702065
P19656	Non-specific lipid-transfer protein OS=Zea mays PE=1 SV=1	0.348533		1.36767
Q9AT35	60S ribosomal protein L23a OS=Daucus carota GN=RPL23A PE=2 SV=1	0.00345434		0.00345434
P46465	26S proteasome regulatory subunit 6A homolog OS=Oryza sativa subsp. japonica GN=TBP1 PE=2 SV=2	0.0251862		0.0251862
O49513	Ras-related protein RABA1e OS=Arabidopsis thaliana GN=RABA1E PE=2 SV=1	387.882		187.468
O64464	Proteasome subunit beta type-1 OS=Oryza sativa subsp. japonica GN=PBF1 PE=2 SV=1	0.964226		1.98215
O50003	60S ribosomal protein L12 OS=Prunus armeniaca GN=RPL12 PE=2 SV=1	1.67532		2.04802
P42794	60S ribosomal protein L11-2 OS=Arabidopsis thaliana GN=RPL11B PE=2 SV=2	0.00619447		0.00619447
P17093	40S ribosomal protein S11 OS=Glycine max GN=RPS11 PE=2 SV=2	0.00922779		0.00922779
Q9ZP21	Thioredoxin M-type, chloroplastic OS=Triticum aestivum PE=2 SV=1	0.710306		0.726941
A2Y5G8	Probable histone H2A.4 OS=Oryza sativa subsp. indica GN=OsI_019561 PE=3 SV=1	0.00207141		0.00207141
Q84Q72	18.1 kDa class I heat shock protein OS=Oryza sativa subsp. japonica GN=HSP18.1 PE=2 SV=1	1.97907		0.00908998
P27880	18.2 kDa class I heat shock protein OS=Medicago sativa GN=HSP18.2 PE=2 SV=1	96.0572		1
O24461	Ras-related protein Rab7 OS=Prunus armeniaca PE=2 SV=1	1		77.3576
O22655	Profilin-4 OS=Zea mays GN=PRO4 PE=1 SV=1	1.31934		1.28349
P80269	NADH dehydrogenase [ubiquinone] iron-sulfur protein 8, mitochondrial OS=Solanum tuberosum PE=1 SV=2	0.00230029		0.00230029
P08903	Histone H3.2 OS=Encephalartos altensteinii PE=1 SV=2	0.540132		1.06919
Q99070	Glycine-rich RNA-binding protein 2 OS=Sorghum bicolor GN=GRP2 PE=2 SV=1	2.65706		4.66602
P00865	Ribulose bisphosphate carboxylase small chain 1, chloroplastic OS=Glycine max GN=RBCS-1 PE=3 SV=1	0.796836		0.906389
Q8S857	Probable histone H2A variant 2 OS=Oryza sativa subsp. japonica GN=Os10g0418000 PE=2 SV=1	0.883006		0.87579
Q41764	Actin-depolymerizing factor 3 OS=Zea mays GN=ADF3 PE=1 SV=1	1		307.509
Q2QPG9	Probable histone H2AXb OS=Oryza sativa subsp. japonica GN=Os12g0530000 PE=2 SV=1	0.00423604		0.00423604
Q09ME8	Photosystem II reaction center protein H OS=Citrus sinensis GN=psbH PE=3 SV=1	0.00151967		0.00151967
Q84VG0	Probable calcium-binding protein CML7 OS=Oryza sativa subsp. japonica GN=CML7 PE=2 SV=1	1.09646		2.18804
P27063	Ribulose bisphosphate carboxylase large chain (Fragment) OS=Capsicum annuum GN=rbcL PE=1 SV=1	1.20167		0.335383
P46252	60S acidic ribosomal protein P2A OS=Zea mays GN=RPP2A PE=1 SV=3	0.801649		1.52728
A1E9M6	30S ribosomal protein S8, chloroplastic OS=Hordeum vulgare GN=rps8 PE=3 SV=1	0.00582637		0.00582637
Q949H0	40S ribosomal protein S7 OS=Hordeum vulgare GN=RPS7 PE=2 SV=1	0.00325241		0.00325241
Q9LST6	Proteasome subunit beta type-2 OS=Oryza sativa subsp. japonica GN=PBD1 PE=2 SV=2	0.0188501		0.0188501
Q9AT34	40S ribosomal protein S15a OS=Daucus carota GN=RPS15A PE=2 SV=3	0.758611		2.31823
O04267	GTP-binding protein SAR1B OS=Brassica campestris GN=SAR1B PE=2 SV=1	0.816133		1.14419
Q08275	17.0 kDa class II heat shock protein OS=Zea mays GN=HSP18 PE=2 SV=1	3.54158		4.81723
P08528	50S ribosomal protein L16, chloroplastic OS=Zea mays GN=rpl16 PE=3 SV=3	0.0126541		1.41102
P55240	Glucose-1-phosphate adenylyltransferase small subunit (Fragment) OS=Zea mays GN=GLG1 PE=2 SV=1	1		279.449
Q6EN80	30S ribosomal protein S19, chloroplastic OS=Oryza nivara GN=rps19-A PE=3 SV=1	0.85562		3.16206
Q9AY76	Actin-depolymerizing factor 2 OS=Oryza sativa subsp. japonica GN=ADF2 PE=2 SV=1	20.2801		1
Q43199	Adenine phosphoribosyltransferase 1 OS=Triticum aestivum GN=APT1 PE=2 SV=1	0.00906848		0.00906848
P27788	Ferredoxin-3, chloroplastic OS=Zea mays GN=FDX3 PE=1 SV=1	0.0130995		0.0130995
Q9STG6	Deoxyuridine 5'-triphosphate nucleotidohydrolase OS=Arabidopsis thaliana GN=DUT PE=1 SV=1	0.00775146		0.00775146
P47903	40S ribosomal protein S27 OS=Chlamydomonas reinhardtii GN=RPS27 PE=3 SV=1	1.97573		0.0204038
		98 DOWN-REGULATION		143 DOWN-REGULATION
		77 UP-REGULATION		74 UP-REGULATION
