# Supplementary material for: Proteomic Changes in Paspalum fasciculatum Leaves Exposed to Cd Stress
Source: Plants (Basel). 2022 Sep 20;11(19):2455. doi: 10.3390/plants11192455 (PMC9573290; doi:10.3390/plants11192455)
Supplement: Supplementary file 1 [file plants-11-02455-s001.zip › Table S3.xlsx]

## Sheet: AREA CT30, CT50
			Table S3. Calculation of the values and standard deviation (SD) of the peak areas of protein species identified for three independent analysis in P. fasciculatum leaves (n=3)
Accession	Description	Cd30, 1	Cd30, 2	Cd30, 3	Cd30, 1	Cd30, 2	Cd30, 3	Means-Cd30		Accession	Description	Cd50, 1	Cd50, 2	Cd50, 3	Cd50, 1	Cd50, 2	Cd50, 3	Means-Cd50
A1E9T1	ATP synthase subunit beta, chloroplastic OS=Sorghum bicolor GN=atpB PE=3 SV=1	790000000	370000000	190000000	618.846	414.636	465.579	499.687		A1E9T1	ATP synthase subunit beta, chloroplastic OS=Sorghum bicolor GN=atpB PE=3 SV=1	120000000	120000000	750000000	436.866	335.42	484.752	419.013
A1E9S1	ATP synthase subunit alpha, chloroplastic OS=Sorghum bicolor GN=atpA PE=3 SV=1	1200000000	830000000	300000000	940.019	930.13	735.125	868.425		A1E9S1	ATP synthase subunit alpha, chloroplastic OS=Sorghum bicolor GN=atpA PE=3 SV=1	140000000	190000000	1600000000	509.677	531.082	1034.14	691.633
P19163	Ribulose bisphosphate carboxylase large chain OS=Neurachne munroi GN=rbcL PE=3 SV=1	38000000	25000000	6200000	29.7673	28.016	15.1926	24.3253		P19163	Ribulose bisphosphate carboxylase large chain OS=Neurachne munroi GN=rbcL PE=3 SV=1	7600000	1200000	14000000	27.6682	3.3542	9.04871	13.357
Q332X1	ATP synthase subunit beta, chloroplastic OS=Lactuca sativa GN=atpB PE=3 SV=1	0	0	0	0	0	0	0		Q332X1	ATP synthase subunit beta, chloroplastic OS=Lactuca sativa GN=atpB PE=3 SV=1	0	0	0	0	0	0	0
B0Z4U4	ATP synthase subunit beta, chloroplastic OS=Oenothera biennis GN=atpB PE=3 SV=1	3800000	5800000	750000	2.97673	6.4997	1.83781	3.77141		B0Z4U4	ATP synthase subunit beta, chloroplastic OS=Oenothera biennis GN=atpB PE=3 SV=1	1600000	840000	4000000	5.82488	2.34794	2.58535	3.58606
A4GYR7	ATP synthase subunit beta, chloroplastic OS=Populus trichocarpa GN=atpB PE=3 SV=1	75000000	3900000	39450000	58.7512	4.37049	96.6689	53.2635		A4GYR7	ATP synthase subunit beta, chloroplastic OS=Populus trichocarpa GN=atpB PE=3 SV=1	0	0	0	0	0	0	0
Q01859	ATP synthase subunit beta, mitochondrial OS=Oryza sativa subsp. japonica GN=ATPB PE=1 SV=2	13000000	4300000	1600000	10.1835	4.81875	3.92067	6.30765		Q01859	ATP synthase subunit beta, mitochondrial OS=Oryza sativa subsp. japonica GN=ATPB PE=1 SV=2	1300000	1200000	7300000	4.73272	3.3542	4.71826	4.26839
P17614	ATP synthase subunit beta, mitochondrial OS=Nicotiana plumbaginifolia GN=ATPB PE=1 SV=1	51000000	32000000	4300000	39.9508	35.8604	10.5368	28.7827		P17614	ATP synthase subunit beta, mitochondrial OS=Nicotiana plumbaginifolia GN=ATPB PE=1 SV=1	0	0	0	0	0	0	0
A1E9V0	Photosystem II CP47 reaction center protein OS=Sorghum bicolor GN=psbB PE=3 SV=1	110000000	48000000	18000000	86.1684	53.7906	44.1075	61.3555		A1E9V0	Photosystem II CP47 reaction center protein OS=Sorghum bicolor GN=psbB PE=3 SV=1	29000000	6400000	82000000	105.576	17.8891	52.9996	58.8216
Q5Z974	ATP-dependent zinc metalloprotease FTSH 1, chloroplastic OS=Oryza sativa subsp. japonica GN=FTSH1 PE=2 SV=1	27000000	6500000	680000	21.1504	7.28415	1.66628	10.0336		Q5Z974	ATP-dependent zinc metalloprotease FTSH 1, chloroplastic OS=Oryza sativa subsp. japonica GN=FTSH1 PE=2 SV=1	530000	250000	12000000	1.92949	0.698792	7.75604	3.46144
Q8SLY2	ATP synthase subunit beta, chloroplastic OS=Chaetosphaeridium globosum GN=atpB PE=3 SV=2	0	0	0	0	0	0	0		Q8SLY2	ATP synthase subunit beta, chloroplastic OS=Chaetosphaeridium globosum GN=atpB PE=3 SV=2	380000	8190000	16000000	1.38341	22.8924	10.3414	11.5391
A6H5I4	ATP synthase subunit beta, chloroplastic OS=Cycas taitungensis GN=atpB PE=3 SV=1	2600000	1800000	2600000	2.03671	2.01715	6.37108	3.47498		A6H5I4	ATP synthase subunit beta, chloroplastic OS=Cycas taitungensis GN=atpB PE=3 SV=1	0	0	0	0	0	0	0
Q40677	Fructose-bisphosphate aldolase, chloroplastic OS=Oryza sativa subsp. japonica GN=ALDP PE=1 SV=2	480000000	1300000000	240000000	376.008	1456.83	588.1	806.979		Q40677	Fructose-bisphosphate aldolase, chloroplastic OS=Oryza sativa subsp. japonica GN=ALDP PE=1 SV=2	140000000	190000000	1300000000	509.677	531.082	840.238	626.999
B1NWD5	ATP synthase subunit alpha, chloroplastic OS=Manihot esculenta GN=atpA PE=3 SV=1	1800000	2300000	2050000	1.41003	2.57747	5.02335	3.00362		B1NWD5	ATP synthase subunit alpha, chloroplastic OS=Manihot esculenta GN=atpA PE=3 SV=1	0	0	0	0	0	0	0
A1E9T7	Cytochrome f OS=Sorghum bicolor GN=petA PE=3 SV=1	160000000	64000000	36000000	125.336	71.7209	88.215	95.0906		A1E9T7	Cytochrome f OS=Sorghum bicolor GN=petA PE=3 SV=1	16000000	43000000	160000000	58.2488	120.192	103.414	93.9516
P05037	ATP synthase subunit beta, chloroplastic OS=Pisum sativum GN=atpB PE=3 SV=1	0	0	0	0	0	0	0		P05037	ATP synthase subunit beta, chloroplastic OS=Pisum sativum GN=atpB PE=3 SV=1	0	0	0	0	0	0	0
P0C1M0	ATP synthase subunit gamma, chloroplastic OS=Zea mays PE=1 SV=1	370000000	320000000	49000000	289.839	358.604	120.07	256.171		P0C1M0	ATP synthase subunit gamma, chloroplastic OS=Zea mays PE=1 SV=1	63000000	42000000	320000000	229.355	117.397	206.828	184.527
A1E9R0	Photosystem II CP43 reaction center protein OS=Sorghum bicolor GN=psbC PE=3 SV=1	370000000	270000000	230000000	289.839	302.572	563.596	385.336		A1E9R0	Photosystem II CP43 reaction center protein OS=Sorghum bicolor GN=psbC PE=3 SV=1	140000000	130000000	460000000	509.677	363.372	297.315	390.121
P46285	Sedoheptulose-1,7-bisphosphatase, chloroplastic OS=Triticum aestivum PE=2 SV=1	120000000	120000000	22000000	94.0019	134.477	53.9092	94.1292		P46285	Sedoheptulose-1,7-bisphosphatase, chloroplastic OS=Triticum aestivum PE=2 SV=1	14000000	22000000	130000000	50.9677	61.4937	84.0238	65.4951
P43227	Ribulose bisphosphate carboxylase large chain (Fragment) OS=Cheiropleuria bicuspis GN=rbcL PE=3 SV=1	3900000	280000	2090000	3.05506	0.313779	5.12137	2.83007		P43227	Ribulose bisphosphate carboxylase large chain (Fragment) OS=Cheiropleuria bicuspis GN=rbcL PE=3 SV=1	450000	280000	200000	1.63825	0.782647	0.129267	0.850054
P0C520	ATP synthase subunit alpha, mitochondrial OS=Oryza sativa GN=ATPA PE=3 SV=1	60000000	33000000	12000000	47.001	36.9811	29.405	37.7957		P0C520	ATP synthase subunit alpha, mitochondrial OS=Oryza sativa GN=ATPA PE=3 SV=1	6900000	13000000	45000000	25.1198	36.3372	29.0851	30.1807
Q655S1	ATP-dependent zinc metalloprotease FTSH 2, chloroplastic OS=Oryza sativa subsp. japonica GN=FTSH2 PE=3 SV=1	33000000	18000000	15000000	25.8505	20.1715	36.7563	27.5928		Q655S1	ATP-dependent zinc metalloprotease FTSH 2, chloroplastic OS=Oryza sativa subsp. japonica GN=FTSH2 PE=3 SV=1	9600000	19300000	29000000	34.9493	53.9468	18.7438	35.8799
Q9STW6	Heat shock 70 kDa protein 6, chloroplastic OS=Arabidopsis thaliana GN=HSP70-6 PE=1 SV=1	43000000	21000000	3400000	33.684	23.5334	8.33142	21.8496		Q9STW6	Heat shock 70 kDa protein 6, chloroplastic OS=Arabidopsis thaliana GN=HSP70-6 PE=1 SV=1	3500000	2200000	46000000	12.7419	6.14937	29.7315	16.2076
P26302	Phosphoribulokinase, chloroplastic OS=Triticum aestivum PE=2 SV=1	72000000	82000000	20000000	56.4012	91.8923	49.0083	65.7673		P26302	Phosphoribulokinase, chloroplastic OS=Triticum aestivum PE=2 SV=1	28000000	36000000	150000000	101.935	100.626	96.9505	99.8373
Q0P3P2	ATP synthase subunit beta, chloroplastic OS=Ostreococcus tauri GN=atpB PE=3 SV=1	4100000	3100000	2100000	3.21173	3.47398	5.14588	3.94386		Q0P3P2	ATP synthase subunit beta, chloroplastic OS=Ostreococcus tauri GN=atpB PE=3 SV=1	28000000	760000	2700000	101.935	2.12433	1.74511	35.2683
P36213	Photosystem I reaction center subunit II, chloroplastic OS=Hordeum vulgare GN=psaD PE=1 SV=1	450000000	470000000	170000000	352.507	526.7	416.571	431.926		P36213	Photosystem I reaction center subunit II, chloroplastic OS=Hordeum vulgare GN=psaD PE=1 SV=1	100000000	200000000	690000000	364.055	559.034	445.972	456.354
Q37227	Ribulose bisphosphate carboxylase large chain (Fragment) OS=Iris germanica GN=rbcL PE=3 SV=2	0	0	0	0	0	0	0		Q37227	Ribulose bisphosphate carboxylase large chain (Fragment) OS=Iris germanica GN=rbcL PE=3 SV=2	0	0	0	0	0	0	0
O64422	Fructose-1,6-bisphosphatase, chloroplastic OS=Oryza sativa subsp. japonica GN=Os03g0267300 PE=2 SV=1	57000000	43000000	160000	44.6509	48.1875	0.392067	31.0768		O64422	Fructose-1,6-bisphosphatase, chloroplastic OS=Oryza sativa subsp. japonica GN=Os03g0267300 PE=2 SV=1	2200000	68000	36000000	8.00921	0.190072	23.2681	10.4891
P93805	Phosphoglucomutase, cytoplasmic 2 OS=Zea mays PE=2 SV=2	9400000	6200000	1000000	7.36348	6.94796	2.45042	5.58729		P93805	Phosphoglucomutase, cytoplasmic 2 OS=Zea mays PE=2 SV=2	760000	690000	4600000	2.76682	1.92867	2.97315	2.55621
Q42971	Enolase OS=Oryza sativa subsp. japonica GN=ENO1 PE=1 SV=2	17000000	19000000	18000000	13.3169	21.2921	44.1075	26.2389		Q42971	Enolase OS=Oryza sativa subsp. japonica GN=ENO1 PE=1 SV=2	2400000	31000	28000000	8.73732	0.0866502	18.0974	8.9738
P37833	Aspartate aminotransferase, cytoplasmic OS=Oryza sativa subsp. japonica GN=Os01g0760600 PE=2 SV=1	87000000	110000000	15000000	68.1514	123.27	36.7563	76.0593		P37833	Aspartate aminotransferase, cytoplasmic OS=Oryza sativa subsp. japonica GN=Os01g0760600 PE=2 SV=1	14000000	17000000	180000000	50.9677	47.5179	116.341	71.6087
A1E9K3	Cytochrome f OS=Hordeum vulgare GN=petA PE=3 SV=1	0	0	0	0	0	0	0		A1E9K3	Cytochrome f OS=Hordeum vulgare GN=petA PE=3 SV=1	0	0	0	0	0	0	0
A4GGA2	Photosystem II D2 protein OS=Phaseolus vulgaris GN=psbD PE=3 SV=1	1100000000	380000000	280000000	861.684	425.843	686.117	657.881		A4GGA2	Photosystem II D2 protein OS=Phaseolus vulgaris GN=psbD PE=3 SV=1	190000000	140000000	840000000	691.705	391.324	542.923	541.984
P15280	Glucose-1-phosphate adenylyltransferase small subunit 2, chloroplastic/amyloplastic/cytosolic OS=Oryza sativa subsp. japonica GN=AGPS2 PE=1 SV=4	31000000	4300000	2400000	24.2838	4.81875	5.881	11.6612		P15280	Glucose-1-phosphate adenylyltransferase small subunit 2, chloroplastic/amyloplastic/cytosolic OS=Oryza sativa subsp. japonica GN=AGPS2 PE=1 SV=4	380000	1900000	25000000	1.38341	5.31082	16.1584	7.61755
P93804	Phosphoglucomutase, cytoplasmic 1 OS=Zea mays PE=2 SV=2	20000000	13000000	16500000	15.667	14.5683	40.4319	23.5557		P93804	Phosphoglucomutase, cytoplasmic 1 OS=Zea mays PE=2 SV=2	900000	72000	39000000	3.2765	0.201252	25.2071	9.56162
P55238	Glucose-1-phosphate adenylyltransferase small subunit, chloroplastic/amyloplastic OS=Hordeum vulgare PE=2 SV=1	14000000	5200000	9600000	10.9669	5.82732	23.524	13.4394		P55238	Glucose-1-phosphate adenylyltransferase small subunit, chloroplastic/amyloplastic OS=Hordeum vulgare PE=2 SV=1	1000000	7000000	12000000	3.64055	19.5662	7.75604	10.3209
P42895	Enolase 2 OS=Zea mays GN=ENO2 PE=2 SV=1	0	0	0	0	0	0	0		P42895	Enolase 2 OS=Zea mays GN=ENO2 PE=2 SV=1	0	0	0	0	0	0	0
Q7F9I1	Chaperone protein ClpC1, chloroplastic OS=Oryza sativa subsp. japonica GN=CLPC1 PE=2 SV=2	3400000	820000	610000	2.66339	0.918923	1.49475	1.69236		Q7F9I1	Chaperone protein ClpC1, chloroplastic OS=Oryza sativa subsp. japonica GN=CLPC1 PE=2 SV=2	1800000	1550000	1300000	6.55299	4.33251	0.840238	3.90858
P27322	Heat shock cognate 70 kDa protein 2 OS=Solanum lycopersicum GN=HSC-2 PE=2 SV=1	15000000	7400000	660000	11.7502	8.29272	1.61728	7.22008		P27322	Heat shock cognate 70 kDa protein 2 OS=Solanum lycopersicum GN=HSC-2 PE=2 SV=1	2049000	98000	4000000	7.45949	0.273927	2.58535	3.43959
Q7SIC9	Transketolase, chloroplastic OS=Zea mays PE=1 SV=1	200000000	99000000	15000000	156.67	110.943	36.7563	101.456		Q7SIC9	Transketolase, chloroplastic OS=Zea mays PE=1 SV=1	6700000	9500000	86000000	24.3917	26.5541	55.5849	35.5102
P25828	Ribulose bisphosphate carboxylase large chain OS=Basella alba GN=rbcL PE=3 SV=1	1500000	1300000	1400000	1.17502	1.45683	3.43058	2.02081		P25828	Ribulose bisphosphate carboxylase large chain OS=Basella alba GN=rbcL PE=3 SV=1	0	0	0	0	0	0	0
Q7XTE8	14-3-3-like protein GF14-B OS=Oryza sativa subsp. japonica GN=GF14B PE=1 SV=2	1200000	1500000	1350000	0.940019	1.68096	3.30806	1.97635		Q7XTE8	14-3-3-like protein GF14-B OS=Oryza sativa subsp. japonica GN=GF14B PE=1 SV=2	110000	3255000	6400000	0.400461	9.09828	4.13655	4.5451
P12857	ADP,ATP carrier protein 2, mitochondrial OS=Zea mays GN=ANT2 PE=2 SV=2	44000000	8800000	1400000	34.4674	9.86162	3.43058	15.9199		P12857	ADP,ATP carrier protein 2, mitochondrial OS=Zea mays GN=ANT2 PE=2 SV=2	1300000	1700000	31000000	4.73272	4.75179	20.0364	9.84031
Q02028	Stromal 70 kDa heat shock-related protein, chloroplastic OS=Pisum sativum GN=HSP70 PE=2 SV=1	13000000	7300000	10150000	10.1835	8.18066	24.8717	14.412		Q02028	Stromal 70 kDa heat shock-related protein, chloroplastic OS=Pisum sativum GN=HSP70 PE=2 SV=1	0	0	0	0	0	0	0
Q9LHA8	Probable mediator of RNA polymerase II transcription subunit 37c OS=Arabidopsis thaliana GN=MED37C PE=1 SV=1	1700000	1100000	260000	1.33169	1.2327	0.637108	1.06717		Q9LHA8	Probable mediator of RNA polymerase II transcription subunit 37c OS=Arabidopsis thaliana GN=MED37C PE=1 SV=1	0	0	0	0	0	0	0
Q2QVG9	Chaperone protein ClpC2, chloroplastic OS=Oryza sativa subsp. japonica GN=CLPC2 PE=2 SV=2	5100000	2700000	1700000	3.99508	3.02572	4.16571	3.72884		Q2QVG9	Chaperone protein ClpC2, chloroplastic OS=Oryza sativa subsp. japonica GN=CLPC2 PE=2 SV=2	370000	550000	3300000	1.347	1.53734	2.13291	1.67242
Q5Z5A8	Photosystem II stability/assembly factor HCF136, chloroplastic OS=Oryza sativa subsp. japonica GN=HCF136 PE=3 SV=1	24000000	27000000	10000000	18.8004	30.2572	24.5042	24.5206		Q5Z5A8	Photosystem II stability/assembly factor HCF136, chloroplastic OS=Oryza sativa subsp. japonica GN=HCF136 PE=3 SV=1	9500000	11000000	38000000	34.5852	30.7469	24.5608	29.9643
Q43298	Chaperonin CPN60-2, mitochondrial OS=Zea mays GN=CPN60II PE=2 SV=1	3800000	2700000	220000	2.97673	3.02572	0.539092	2.18051		Q43298	Chaperonin CPN60-2, mitochondrial OS=Zea mays GN=CPN60II PE=2 SV=1	64000	190000	2400000	0.232995	0.531082	1.55121	0.771762
P09672	Glyceraldehyde-3-phosphate dehydrogenase A, chloroplastic (Fragment) OS=Sinapis alba GN=GAPA PE=2 SV=1	130000000	120000000	7100000	101.835	134.477	17.398	84.57		P09672	Glyceraldehyde-3-phosphate dehydrogenase A, chloroplastic (Fragment) OS=Sinapis alba GN=GAPA PE=2 SV=1	18000000	3300000	150000000	65.5299	9.22406	96.9505	57.2348
P12783	Phosphoglycerate kinase, cytosolic OS=Triticum aestivum PE=2 SV=1	65000000	57000000	11000000	50.9177	63.8764	26.9546	47.2496		P12783	Phosphoglycerate kinase, cytosolic OS=Triticum aestivum PE=2 SV=1	7000000	8300000	74000000	25.4839	23.1999	47.8289	32.1709
P09315	Glyceraldehyde-3-phosphate dehydrogenase A, chloroplastic OS=Zea mays GN=GAPA PE=2 SV=1	130000000	92000000	4300000	101.835	103.099	10.5368	71.8236		P09315	Glyceraldehyde-3-phosphate dehydrogenase A, chloroplastic OS=Zea mays GN=GAPA PE=2 SV=1	15000000	8300000	180000000	54.6083	23.1999	116.341	64.7163
P26301	Enolase 1 OS=Zea mays GN=ENO1 PE=2 SV=1	9700000	3500000	230000	7.59849	3.92223	0.563596	4.02811		P26301	Enolase 1 OS=Zea mays GN=ENO1 PE=2 SV=1	770000	87000	6200000	2.80322	0.24318	4.00729	2.35123
A1E9J0	Photosystem I P700 chlorophyll a apoprotein A2 OS=Hordeum vulgare GN=psaB PE=3 SV=1	180000000	130000000	94000000	141.003	145.683	230.339	172.342		A1E9J0	Photosystem I P700 chlorophyll a apoprotein A2 OS=Hordeum vulgare GN=psaB PE=3 SV=1	120000000	85000000	270000000	436.866	237.589	174.511	282.989
Q9ZT00	Ribulose bisphosphate carboxylase/oxygenase activase, chloroplastic OS=Zea mays GN=RCA1 PE=2 SV=3	6300000	3300000	4800000	4.9351	3.69811	11.762	6.7984		Q9ZT00	Ribulose bisphosphate carboxylase/oxygenase activase, chloroplastic OS=Zea mays GN=RCA1 PE=2 SV=3	650000	810000	7500000	2.36636	2.26409	4.84752	3.15932
Q40078	V-type proton ATPase subunit B 1 OS=Hordeum vulgare PE=2 SV=1	8400000	2500000	930000	6.58013	2.8016	2.27889	3.88687		Q40078	V-type proton ATPase subunit B 1 OS=Hordeum vulgare PE=2 SV=1	340000	340000	8600000	1.23779	0.950358	5.55849	2.58221
P23322	Oxygen-evolving enhancer protein 1, chloroplastic OS=Solanum lycopersicum GN=PSBO PE=2 SV=2	230000000	73000000	15150000	180.17	81.8066	37.1238	99.7003		P23322	Oxygen-evolving enhancer protein 1, chloroplastic OS=Solanum lycopersicum GN=PSBO PE=2 SV=2	65000000	283500000	500000000	236.636	792.43	323.168	450.745
Q08080	Stromal 70 kDa heat shock-related protein, chloroplastic (Fragment) OS=Spinacia oleracea GN=CHSP70 PE=2 SV=1	21000000	12000000	16500000	16.4503	13.4477	40.4319	23.4433		Q08080	Stromal 70 kDa heat shock-related protein, chloroplastic (Fragment) OS=Spinacia oleracea GN=CHSP70 PE=2 SV=1	2800000	15900000	29000000	10.1935	44.4432	18.7438	24.4602
P27774	Phosphoribulokinase, chloroplastic OS=Mesembryanthemum crystallinum PE=2 SV=1	30000000	27000000	330000	23.5005	30.2572	0.808638	18.1888		P27774	Phosphoribulokinase, chloroplastic OS=Mesembryanthemum crystallinum PE=2 SV=1	3800000	30400000	57000000	13.8341	84.9731	36.8412	45.2161
P08440	Fructose-bisphosphate aldolase, cytoplasmic isozyme OS=Zea mays PE=2 SV=1	25000000	19000000	1800000	19.5837	21.2921	4.41075	15.0955		P08440	Fructose-bisphosphate aldolase, cytoplasmic isozyme OS=Zea mays PE=2 SV=1	1300000	1600000	11000000	4.73272	4.47227	7.1097	5.43823
P24629	Heat shock cognate 70 kDa protein 1 OS=Solanum lycopersicum GN=HSC-I PE=2 SV=1	0	0	0	0	0	0	0		P24629	Heat shock cognate 70 kDa protein 1 OS=Solanum lycopersicum GN=HSC-I PE=2 SV=1	0	0	0	0	0	0	0
Q09054	Glyceraldehyde-3-phosphate dehydrogenase 2, cytosolic OS=Zea mays GN=GAPC2 PE=2 SV=1	1600000	100000	850000	1.25336	0.112064	2.08285	1.14943		Q09054	Glyceraldehyde-3-phosphate dehydrogenase 2, cytosolic OS=Zea mays GN=GAPC2 PE=2 SV=1	0	0	0	0	0	0	0
Q6Z7B0	Heat shock 70 kDa protein BIP1 OS=Oryza sativa subsp. japonica GN=BIP1 PE=1 SV=1	1100000	840000	970000	0.861684	0.941336	2.3769	1.39331		Q6Z7B0	Heat shock 70 kDa protein BIP1 OS=Oryza sativa subsp. japonica GN=BIP1 PE=1 SV=1	0	0	0	0	0	0	0
P22954	Probable mediator of RNA polymerase II transcription subunit 37c OS=Arabidopsis thaliana GN=MED37D PE=1 SV=2	7700000	3300000	37000	6.03179	3.69811	0.0906654	3.27352		P22954	Probable mediator of RNA polymerase II transcription subunit 37c OS=Arabidopsis thaliana GN=MED37D PE=1 SV=2	390000	1795000	3200000	1.41981	5.01733	2.06828	2.83514
P08823	RuBisCO large subunit-binding protein subunit alpha, chloroplastic (Fragment) OS=Triticum aestivum PE=1 SV=1	21000000	12000000	3100000	16.4503	13.4477	7.59629	12.4981		P08823	RuBisCO large subunit-binding protein subunit alpha, chloroplastic (Fragment) OS=Triticum aestivum PE=1 SV=1	3100000	2500000	28000000	11.2857	6.98792	18.0974	12.1237
P38562	Glutamine synthetase root isozyme 4 OS=Zea mays GN=GLN5 PE=2 SV=1	0	0	0	0	0	0	0		P38562	Glutamine synthetase root isozyme 4 OS=Zea mays GN=GLN5 PE=2 SV=1	0	0	0	0	0	0	0
O80860	ATP-dependent zinc metalloprotease FTSH 2, chloroplastic OS=Arabidopsis thaliana GN=FTSH2 PE=1 SV=1	7700000	5100000	2000000	6.03179	5.71526	4.90083	5.54929		O80860	ATP-dependent zinc metalloprotease FTSH 2, chloroplastic OS=Arabidopsis thaliana GN=FTSH2 PE=1 SV=1	960000	1500000	4500000	3.49493	4.19275	2.90851	3.53207
P12859	Glyceraldehyde-3-phosphate dehydrogenase B, chloroplastic OS=Pisum sativum GN=GAPB PE=2 SV=2	37000000	27000000	5100000	28.9839	30.2572	12.4971	23.9128		P12859	Glyceraldehyde-3-phosphate dehydrogenase B, chloroplastic OS=Pisum sativum GN=GAPB PE=2 SV=2	4800000	5100000	29000000	17.4746	14.2554	18.7438	16.8246
Q6ENW7	ATP synthase subunit b, chloroplastic OS=Saccharum officinarum GN=atpF PE=3 SV=1	26000000	21000000	9900000	20.3671	23.5334	24.2591	22.7199		Q6ENW7	ATP synthase subunit b, chloroplastic OS=Saccharum officinarum GN=atpF PE=3 SV=1	6400000	9900000	33000000	23.2995	27.6722	21.3291	24.1003
Q9LRR9	Peroxisomal (S)-2-hydroxy-acid oxidase GLO1 OS=Arabidopsis thaliana GN=GLO1 PE=1 SV=1	41000000	45000000	12000000	32.1173	50.4287	29.405	37.317		Q9LRR9	Peroxisomal (S)-2-hydroxy-acid oxidase GLO1 OS=Arabidopsis thaliana GN=GLO1 PE=1 SV=1	8000000	7400000	61000000	29.1244	20.6843	39.4265	29.7451
P42066	Phosphoenolpyruvate carboxykinase (ATP) OS=Cucumis sativus GN=PCK PE=2 SV=1	76000000	47000000	8200000	59.5346	52.67	20.0934	44.0993		P42066	Phosphoenolpyruvate carboxykinase (ATP) OS=Cucumis sativus GN=PCK PE=2 SV=1	2200000	1700000	8900000	8.00921	4.75179	5.7524	6.17113
A1E9Q4	Photosystem II protein D1 OS=Sorghum bicolor GN=psbA PE=3 SV=1	99000000	90000000	110000000	77.5516	100.857	269.546	149.318		A1E9Q4	Photosystem II protein D1 OS=Sorghum bicolor GN=psbA PE=3 SV=1	37000000	110000000	300000000	134.7	307.469	193.901	212.023
B8B7C5	Peroxisomal (S)-2-hydroxy-acid oxidase GLO5 OS=Oryza sativa subsp. indica GN=GLO5 PE=3 SV=1	18000000	24000000	6000000	14.1003	26.8953	14.7025	18.566		B8B7C5	Peroxisomal (S)-2-hydroxy-acid oxidase GLO5 OS=Oryza sativa subsp. indica GN=GLO5 PE=3 SV=1	5100000	16000000	30000000	18.5668	44.7227	19.3901	27.5599
P49087	V-type proton ATPase catalytic subunit A (Fragment) OS=Zea mays PE=2 SV=1	6900000	4300000	650000	5.40511	4.81875	1.59277	3.93888		P49087	V-type proton ATPase catalytic subunit A (Fragment) OS=Zea mays PE=2 SV=1	660000	450000	4200000	2.40276	1.25783	2.71461	2.12507
P92549	ATP synthase subunit alpha, mitochondrial OS=Arabidopsis thaliana GN=ATPA PE=1 SV=2	8400000	6100000	7250000	6.58013	6.83589	17.7655	10.3939		P92549	ATP synthase subunit alpha, mitochondrial OS=Arabidopsis thaliana GN=ATPA PE=1 SV=2	0	0	0	0	0	0	0
P80608	Cysteine synthase OS=Zea mays PE=1 SV=2	5700000	3900000	180000	4.46509	4.37049	0.441075	3.09222		P80608	Cysteine synthase OS=Zea mays PE=1 SV=2	480000	77000	14000000	1.74746	0.215228	9.04871	3.67047
Q9ZP06	Malate dehydrogenase 1, mitochondrial OS=Arabidopsis thaliana GN=At1g53240 PE=1 SV=1	0	0	0	0	0	0	0		Q9ZP06	Malate dehydrogenase 1, mitochondrial OS=Arabidopsis thaliana GN=At1g53240 PE=1 SV=1	0	0	0	0	0	0	0
Q42962	Phosphoglycerate kinase, cytosolic OS=Nicotiana tabacum PE=2 SV=1	15000000	20000000	17500000	11.7502	22.4128	42.8823	25.6818		Q42962	Phosphoglycerate kinase, cytosolic OS=Nicotiana tabacum PE=2 SV=1	850000	11425000	22000000	3.09447	31.9348	14.2194	16.4162
Q2QLY5	5-methyltetrahydropteroyltriglutamate--homocysteine methyltransferase 1 OS=Oryza sativa subsp. japonica GN=Os12g0623900 PE=2 SV=1	5400000	1900000	3650000	4.23009	2.12921	8.94402	5.10111		Q2QLY5	5-methyltetrahydropteroyltriglutamate--homocysteine methyltransferase 1 OS=Oryza sativa subsp. japonica GN=Os12g0623900 PE=2 SV=1	0	0	0	0	0	0	0
P11155	Pyruvate, phosphate dikinase 1, chloroplastic OS=Zea mays GN=PPDK1 PE=1 SV=2	10000000	6600000	1300000	7.83349	7.39621	3.18554	6.13842		P11155	Pyruvate, phosphate dikinase 1, chloroplastic OS=Zea mays GN=PPDK1 PE=1 SV=2	960000	840000	5200000	3.49493	2.34794	3.36095	3.06794
P38561	Glutamine synthetase root isozyme 3 OS=Zea mays GN=GLN4 PE=1 SV=1	560000	620000	590000	0.438676	0.694796	1.44575	0.859739		P38561	Glutamine synthetase root isozyme 3 OS=Zea mays GN=GLN4 PE=1 SV=1	0	0	0	0	0	0	0
P23345	Superoxide dismutase [Cu-Zn] 4A OS=Zea mays GN=SODCC.3 PE=2 SV=2	3500000	3200000	1900000	2.74172	3.58604	4.65579	3.66119		P23345	Superoxide dismutase [Cu-Zn] 4A OS=Zea mays GN=SODCC.3 PE=2 SV=2	1700000	3600000	7400000	6.18894	10.0626	4.78289	7.01148
A1E9Y0	NAD(P)H-quinone oxidoreductase subunit H, chloroplastic OS=Sorghum bicolor GN=ndhH PE=3 SV=1	15000000	45000000	30000000	11.7502	50.4287	73.5125	45.2305		A1E9Y0	NAD(P)H-quinone oxidoreductase subunit H, chloroplastic OS=Sorghum bicolor GN=ndhH PE=3 SV=1	0	0	0	0	0	0	0
A2WKS5	Histone H2B.8 OS=Oryza sativa subsp. indica GN=H2B.8 PE=3 SV=1	3500000	2300000	490000	2.74172	2.57747	1.2007	2.1733		A2WKS5	Histone H2B.8 OS=Oryza sativa subsp. indica GN=H2B.8 PE=3 SV=1	590000	980000	3600000	2.14793	2.73927	2.32681	2.40467
Q75GT3	Chaperone protein ClpB2, chloroplastic OS=Oryza sativa subsp. japonica GN=CLPB2 PE=2 SV=1	3200000	1700000	210000	2.50672	1.90509	0.514588	1.64213		Q75GT3	Chaperone protein ClpB2, chloroplastic OS=Oryza sativa subsp. japonica GN=CLPB2 PE=2 SV=1	775000	150000	1400000	2.82143	0.419275	0.904871	1.38186
Q41048	Oxygen-evolving enhancer protein 3-1, chloroplastic OS=Zea mays GN=PSBQ1 PE=2 SV=1	75000000	17000000	9500000	58.7512	19.0509	23.279	33.6937		Q41048	Oxygen-evolving enhancer protein 3-1, chloroplastic OS=Zea mays GN=PSBQ1 PE=2 SV=1	19000000	11000000	140000000	69.1705	30.7469	90.4871	63.4681
Q6Z2Z4	Eukaryotic initiation factor 4A-3 OS=Oryza sativa subsp. japonica GN=Os02g0146600 PE=1 SV=1	0	0	0	0	0	0	0		Q6Z2Z4	Eukaryotic initiation factor 4A-3 OS=Oryza sativa subsp. japonica GN=Os02g0146600 PE=1 SV=1	0	0	0	0	0	0	0
Q944G9	Fructose-bisphosphate aldolase 2, chloroplastic OS=Arabidopsis thaliana GN=FBA2 PE=1 SV=2	270000000	260000000	51000000	211.504	291.366	124.971	209.281		Q944G9	Fructose-bisphosphate aldolase 2, chloroplastic OS=Arabidopsis thaliana GN=FBA2 PE=1 SV=2	31000000	48000000	240000000	112.857	134.168	155.121	134.049
Q6ER94	2-Cys peroxiredoxin BAS1, chloroplastic OS=Oryza sativa subsp. japonica GN=BAS1 PE=1 SV=1	38000000	10000000	24000000	29.7673	11.2064	58.81	33.2612		Q6ER94	2-Cys peroxiredoxin BAS1, chloroplastic OS=Oryza sativa subsp. japonica GN=BAS1 PE=1 SV=1	1800000	30400000	59000000	6.55299	84.9731	38.1339	43.22
Q42961	Phosphoglycerate kinase, chloroplastic OS=Nicotiana tabacum PE=2 SV=1	0	0	0	0	0	0	0		Q42961	Phosphoglycerate kinase, chloroplastic OS=Nicotiana tabacum PE=2 SV=1	230000	40000	43000000	0.837327	0.111807	27.7925	9.58054
Q9LD57	Phosphoglycerate kinase 1, chloroplastic OS=Arabidopsis thaliana GN=PGK1 PE=1 SV=1	0	0	0	0	0	0	0		Q9LD57	Phosphoglycerate kinase 1, chloroplastic OS=Arabidopsis thaliana GN=PGK1 PE=1 SV=1	6200000	24600000	43000000	22.5714	68.7612	27.7925	39.7084
Q43831	RuBisCO large subunit-binding protein subunit beta, chloroplastic (Fragment) OS=Secale cereale GN=CPN60 PE=2 SV=1	5100000	3300000	1400000	3.99508	3.69811	3.43058	3.70792		Q43831	RuBisCO large subunit-binding protein subunit beta, chloroplastic (Fragment) OS=Secale cereale GN=CPN60 PE=2 SV=1	690000	940000	3600000	2.51198	2.62746	2.32681	2.48875
P53492	Actin-7 OS=Arabidopsis thaliana GN=ACT7 PE=1 SV=1	1400000	6100000	3750000	1.09669	6.83589	9.18906	5.70722		P53492	Actin-7 OS=Arabidopsis thaliana GN=ACT7 PE=1 SV=1	0	0	0	0	0	0	0
Q43772	UTP--glucose-1-phosphate uridylyltransferase OS=Hordeum vulgare PE=2 SV=1	24000000	12000000	18000000	18.8004	13.4477	44.1075	25.4518		Q43772	UTP--glucose-1-phosphate uridylyltransferase OS=Hordeum vulgare PE=2 SV=1	3000000	4500000	12000000	10.9217	12.5783	7.75604	10.4187
P53504	Actin-1 OS=Sorghum bicolor GN=AC1 PE=2 SV=1	23000000	9500000	16250000	18.017	10.6461	39.8193	22.8275		P53504	Actin-1 OS=Sorghum bicolor GN=AC1 PE=2 SV=1	1600000	13300000	25000000	5.82488	37.1757	16.1584	19.7197
P26517	Glyceraldehyde-3-phosphate dehydrogenase 1, cytosolic OS=Hordeum vulgare GN=GAPC PE=2 SV=1	0	0	0	0	0	0	0		P26517	Glyceraldehyde-3-phosphate dehydrogenase 1, cytosolic OS=Hordeum vulgare GN=GAPC PE=2 SV=1	0	0	0	0	0	0	0
Q6ZIV7	Hypersensitive-induced response protein 1 OS=Oryza sativa subsp. japonica GN=HIR1 PE=1 SV=1	16000000	3900000	1300000	12.5336	4.37049	3.18554	6.69654		Q6ZIV7	Hypersensitive-induced response protein 1 OS=Oryza sativa subsp. japonica GN=HIR1 PE=1 SV=1	950000	4525000	8100000	3.45852	12.6481	5.23533	7.114
O65107	Photosystem I reaction center subunit N, chloroplastic (Fragment) OS=Zea mays GN=PSAN PE=2 SV=1	63000000	38000000	27000000	49.351	42.5843	66.1613	52.6988		O65107	Photosystem I reaction center subunit N, chloroplastic (Fragment) OS=Zea mays GN=PSAN PE=2 SV=1	23000000	32000000	100000000	83.7327	89.4454	64.6337	79.2706
P29409	Phosphoglycerate kinase, chloroplastic (Fragment) OS=Spinacia oleracea PE=2 SV=2	11000000	8900000	2500000	8.61684	9.97368	6.12604	8.23886		P29409	Phosphoglycerate kinase, chloroplastic (Fragment) OS=Spinacia oleracea PE=2 SV=2	1300000	1900000	8200000	4.73272	5.31082	5.29996	5.1145
P31405	V-type proton ATPase catalytic subunit A OS=Gossypium hirsutum GN=CVA69.24 PE=2 SV=1	11000000	6700000	8850000	8.61684	7.50828	21.6862	12.6038		P31405	V-type proton ATPase catalytic subunit A OS=Gossypium hirsutum GN=CVA69.24 PE=2 SV=1	0	0	0	0	0	0	0
Q6ZKC0	14-3-3-like protein GF14-C OS=Oryza sativa subsp. japonica GN=GF14C PE=1 SV=1	23000000	6800000	1800000	18.017	7.62034	4.41075	10.016		Q6ZKC0	14-3-3-like protein GF14-C OS=Oryza sativa subsp. japonica GN=GF14C PE=1 SV=1	3200000	2800000	22000000	11.6498	7.82647	14.2194	11.2319
Q9BAE0	ATP-dependent zinc metalloprotease FTSH, chloroplastic OS=Medicago sativa GN=FTSH PE=2 SV=1	1980000	3500000	460000	1.55103	3.92223	1.12719	2.20015		Q9BAE0	ATP-dependent zinc metalloprotease FTSH, chloroplastic OS=Medicago sativa GN=FTSH PE=2 SV=1	440000	1870000	3300000	1.60184	5.22697	2.13291	2.98724
P26300	Enolase OS=Solanum lycopersicum GN=PGH1 PE=2 SV=1	8900000	4400000	6650000	6.97181	4.93081	16.2953	9.3993		P26300	Enolase OS=Solanum lycopersicum GN=PGH1 PE=2 SV=1	130000	3565000	7000000	0.473272	9.96478	4.52436	4.98747
P08735	Glyceraldehyde-3-phosphate dehydrogenase 1, cytosolic OS=Zea mays GN=GAPC1 PE=2 SV=2	3000000	3300000	130000	2.35005	3.69811	0.318554	2.12224		P08735	Glyceraldehyde-3-phosphate dehydrogenase 1, cytosolic OS=Zea mays GN=GAPC1 PE=2 SV=2	560000	2130000	3700000	2.03871	5.95371	2.39145	3.46129
Q08062	Malate dehydrogenase, cytoplasmic OS=Zea mays PE=1 SV=2	61000000	38000000	49500000	47.7843	42.5843	121.296	70.5547		Q08062	Malate dehydrogenase, cytoplasmic OS=Zea mays PE=1 SV=2	3400000	18200000	33000000	12.3779	50.8721	21.3291	28.193
Q43843	Ribulose-phosphate 3-epimerase, chloroplastic (Fragment) OS=Solanum tuberosum PE=1 SV=1	30000000	6600000	18300000	23.5005	7.39621	44.8426	25.2464		Q43843	Ribulose-phosphate 3-epimerase, chloroplastic (Fragment) OS=Solanum tuberosum PE=1 SV=1	2100000	18550000	35000000	7.64516	51.8504	22.6218	27.3724
P30173	Actin-101 OS=Solanum tuberosum GN=AC101 PE=3 SV=1	31000000	20000000	2800000	24.2838	22.4128	6.86117	17.8526		P30173	Actin-101 OS=Solanum tuberosum GN=AC101 PE=3 SV=1	2200000	3000000	66000000	8.00921	8.38551	42.6582	19.6843
P11428	Superoxide dismutase [Cu-Zn] 2 OS=Zea mays GN=SODCC.1 PE=2 SV=2	3200000	2100000	1200000	2.50672	2.35334	2.9405	2.60019		P11428	Superoxide dismutase [Cu-Zn] 2 OS=Zea mays GN=SODCC.1 PE=2 SV=2	1300000	2700000	11000000	4.73272	7.54696	7.1097	6.46313
A2XMV1	Glutamate dehydrogenase 1, mitochondrial OS=Oryza sativa subsp. indica GN=GDH1 PE=3 SV=2	10000000	12000000	130000	7.83349	13.4477	0.318554	7.1999		A2XMV1	Glutamate dehydrogenase 1, mitochondrial OS=Oryza sativa subsp. indica GN=GDH1 PE=3 SV=2	670000	4135000	7600000	2.43917	11.558	4.91216	6.30312
Q69LA6	Probable pyridoxal 5'-phosphate synthase subunit PDX1.1 OS=Oryza sativa subsp. japonica GN=PDX11 PE=2 SV=1	19000000	11000000	1300000	14.8836	12.327	3.18554	10.1321		Q69LA6	Probable pyridoxal 5'-phosphate synthase subunit PDX1.1 OS=Oryza sativa subsp. japonica GN=PDX11 PE=2 SV=1	1600000	2800000	35000000	5.82488	7.82647	22.6218	12.091
P41344	Ferredoxin--NADP reductase, leaf isozyme, chloroplastic OS=Oryza sativa subsp. japonica GN=Os06g0107700 PE=2 SV=1	35000000	16000000	1200000	27.4172	17.9302	2.9405	16.096		P41344	Ferredoxin--NADP reductase, leaf isozyme, chloroplastic OS=Oryza sativa subsp. japonica GN=Os06g0107700 PE=2 SV=1	2600000	2000000	43000000	9.46543	5.59034	27.7925	14.2827
P08927	RuBisCO large subunit-binding protein subunit beta, chloroplastic OS=Pisum sativum PE=1 SV=2	450000	1900000	11750000	0.352507	2.12921	28.7924	10.4247		P08927	RuBisCO large subunit-binding protein subunit beta, chloroplastic OS=Pisum sativum PE=1 SV=2	0	0	0	0	0	0	0
Q84J55	14-3-3-like protein GF14-A OS=Oryza sativa subsp. japonica GN=GF14A PE=2 SV=1	9400000	1600000	2300000	7.36348	1.79302	5.63596	4.93082		Q84J55	14-3-3-like protein GF14-A OS=Oryza sativa subsp. japonica GN=GF14A PE=2 SV=1	2400000	4000000	11000000	8.73732	11.1807	7.1097	9.00923
P62786	Histone H4 variant TH091 OS=Triticum aestivum PE=3 SV=2	11000000	9100000	4000000	8.61684	10.1978	9.80167	9.53877		P62786	Histone H4 variant TH091 OS=Triticum aestivum PE=3 SV=2	3500000	6800000	23000000	12.7419	19.0072	14.8657	15.5383
P12329	Chlorophyll a-b binding protein 1, chloroplastic OS=Zea mays GN=CAB1 PE=3 SV=1	59000000	2900000	4900000	46.2176	3.24985	12.007	20.4915		P12329	Chlorophyll a-b binding protein 1, chloroplastic OS=Zea mays GN=CAB1 PE=3 SV=1	3800000	4600000	82000000	13.8341	12.8578	52.9996	26.5638
Q9SP07	14-3-3-like protein OS=Lilium longiflorum PE=2 SV=1	3100000	1500000	290000	2.42838	1.68096	0.710621	1.60665		Q9SP07	14-3-3-like protein OS=Lilium longiflorum PE=2 SV=1	2000000	3400000	4800000	7.2811	9.50358	3.10242	6.62903
Q43247	Glyceraldehyde-3-phosphate dehydrogenase 3, cytosolic OS=Zea mays GN=GAPC3 PE=2 SV=1	1100000	1800000	970000	0.861684	2.01715	2.3769	1.75191		Q43247	Glyceraldehyde-3-phosphate dehydrogenase 3, cytosolic OS=Zea mays GN=GAPC3 PE=2 SV=1	1800000	1000000	1500000	6.55299	2.79517	0.969505	3.43922
Q43321	Enolase OS=Alnus glutinosa GN=PGH1 PE=2 SV=1	17000000	8700000	12850000	13.3169	9.74955	31.4879	18.1848		Q43321	Enolase OS=Alnus glutinosa GN=PGH1 PE=2 SV=1	480000	5040000	9600000	1.74746	14.0877	6.20483	7.34665
C0Z361	Chaperonin 60 subunit beta 3, chloroplastic OS=Arabidopsis thaliana GN=CPN60B3 PE=1 SV=1	0	0	0	0	0	0	0		C0Z361	Chaperonin 60 subunit beta 3, chloroplastic OS=Arabidopsis thaliana GN=CPN60B3 PE=1 SV=1	0	0	0	0	0	0	0
P14830	Superoxide dismutase [Cu-Zn] 1 OS=Solanum lycopersicum GN=SODCC.1 PE=2 SV=2	12000000	13000000	11000000	9.40019	14.5683	26.9546	16.9744		P14830	Superoxide dismutase [Cu-Zn] 1 OS=Solanum lycopersicum GN=SODCC.1 PE=2 SV=2	11000000	10000000	31000000	40.0461	27.9517	20.0364	29.3447
Q8S0J7	Probable membrane-associated 30 kDa protein, chloroplastic OS=Oryza sativa subsp. japonica GN=Os01g0895100 PE=1 SV=1	6000000	2700000	890000	4.7001	3.02572	2.18087	3.30223		Q8S0J7	Probable membrane-associated 30 kDa protein, chloroplastic OS=Oryza sativa subsp. japonica GN=Os01g0895100 PE=1 SV=1	890000	1900000	7800000	3.24009	5.31082	5.04143	4.53078
A8Y9E3	NAD(P)H-quinone oxidoreductase subunit H, chloroplastic OS=Lolium perenne GN=ndhH PE=3 SV=1	18000000	20000000	5400000	14.1003	22.4128	13.2323	16.5818		A8Y9E3	NAD(P)H-quinone oxidoreductase subunit H, chloroplastic OS=Lolium perenne GN=ndhH PE=3 SV=1	3900000	6000000	20000000	14.1981	16.771	12.9267	14.632
P49105	Glucose-6-phosphate isomerase, cytosolic OS=Zea mays GN=PHI1 PE=2 SV=1	15000000	1400000	1400000	11.7502	1.56889	3.43058	5.58324		P49105	Glucose-6-phosphate isomerase, cytosolic OS=Zea mays GN=PHI1 PE=2 SV=1	1000000	840000	10000000	3.64055	2.34794	6.46337	4.15062
O65316	Actin OS=Mesostigma viride PE=3 SV=1	10000000	3800000	37000	7.83349	4.25843	0.0906654	4.06086		O65316	Actin OS=Mesostigma viride PE=3 SV=1	1100000	4050000	7000000	4.00461	11.3204	4.52436	6.61647
Q0J4P2	Heat shock protein 81-1 OS=Oryza sativa subsp. japonica GN=HSP81-1 PE=3 SV=2	11000000	6800000	3700000	8.61684	7.62034	9.06654	8.43458		Q0J4P2	Heat shock protein 81-1 OS=Oryza sativa subsp. japonica GN=HSP81-1 PE=3 SV=2	1500000	2200000	7300000	5.46083	6.14937	4.71826	5.44282
Q6ENP6	Photosystem I iron-sulfur center OS=Saccharum officinarum GN=psaC PE=3 SV=3	200000000	150000000	52000000	156.67	168.096	127.422	150.729		Q6ENP6	Photosystem I iron-sulfur center OS=Saccharum officinarum GN=psaC PE=3 SV=3	65000000	54000000	160000000	236.636	150.939	103.414	163.663
A6YGB8	Photosystem II protein D1 OS=Pleurastrum terricola GN=psbA PE=3 SV=2	250000000	147500000	45000000	195.837	165.294	110.269	157.133		A6YGB8	Photosystem II protein D1 OS=Pleurastrum terricola GN=psbA PE=3 SV=2	120000000	6800000	63400000	436.866	19.0072	40.9777	165.617
O24047	Malate dehydrogenase, cytoplasmic OS=Mesembryanthemum crystallinum GN=MDH PE=2 SV=1	0	0	0	0	0	0	0		O24047	Malate dehydrogenase, cytoplasmic OS=Mesembryanthemum crystallinum GN=MDH PE=2 SV=1	0	0	0	0	0	0	0
P43188	Adenylate kinase, chloroplastic OS=Zea mays GN=ADK1 PE=1 SV=1	8700000	3200000	5950000	6.81514	3.58604	14.58	8.32705		P43188	Adenylate kinase, chloroplastic OS=Zea mays GN=ADK1 PE=1 SV=1	550000	6775000	13000000	2.0023	18.9373	8.40238	9.78065
Q7XPY2	Plasma membrane ATPase OS=Oryza sativa subsp. japonica GN=Os04g0656100 PE=2 SV=1	2200000	310000	420000	1.72337	0.347398	1.02918	1.03331		Q7XPY2	Plasma membrane ATPase OS=Oryza sativa subsp. japonica GN=Os04g0656100 PE=2 SV=1	510000	350000	430000	1.85668	0.978309	0.277925	1.03764
Q6K439	Probable plastid-lipid-associated protein 2, chloroplastic OS=Oryza sativa subsp. japonica GN=PAP2 PE=2 SV=1	49000000	18000000	7400000	38.3841	20.1715	18.1331	25.5629		Q6K439	Probable plastid-lipid-associated protein 2, chloroplastic OS=Oryza sativa subsp. japonica GN=PAP2 PE=2 SV=1	4900000	6100000	65000000	17.8387	17.0505	42.0119	25.6337
P43643	Elongation factor 1-alpha OS=Nicotiana tabacum PE=2 SV=1	6700000	5600000	6150000	5.24844	6.27558	15.0701	8.86469		P43643	Elongation factor 1-alpha OS=Nicotiana tabacum PE=2 SV=1	0	0	0	0	0	0	0
P12863	Triosephosphate isomerase, cytosolic OS=Zea mays PE=3 SV=3	4900000	1900000	330000	3.83841	2.12921	0.808638	2.25875		P12863	Triosephosphate isomerase, cytosolic OS=Zea mays PE=3 SV=3	1100000	800000	5500000	4.00461	2.23614	3.55485	3.2652
Q9LSU3	Proteasome subunit alpha type-6 OS=Oryza sativa subsp. japonica GN=PAA1 PE=2 SV=1	15000000	2300000	8650000	11.7502	2.57747	21.1961	11.8413		Q9LSU3	Proteasome subunit alpha type-6 OS=Oryza sativa subsp. japonica GN=PAA1 PE=2 SV=1	370000	6685000	13000000	1.347	18.6857	8.40238	9.47836
A1E9S7	NAD(P)H-quinone oxidoreductase subunit J, chloroplastic OS=Sorghum bicolor GN=ndhJ PE=3 SV=1	43000000	33000000	1300000	33.684	36.9811	3.18554	24.6169		A1E9S7	NAD(P)H-quinone oxidoreductase subunit J, chloroplastic OS=Sorghum bicolor GN=ndhJ PE=3 SV=1	5100000	1200000	57000000	18.5668	3.3542	36.8412	19.5874
Q01516	Fructose-bisphosphate aldolase 1, chloroplastic (Fragment) OS=Pisum sativum PE=1 SV=1	0	0	0	0	0	0	0		Q01516	Fructose-bisphosphate aldolase 1, chloroplastic (Fragment) OS=Pisum sativum PE=1 SV=1	0	0	0	0	0	0	0
Q40281	Ribulose bisphosphate carboxylase/oxygenase activase, chloroplastic OS=Malus domestica GN=RCA PE=2 SV=1	12000000	11000000	1200000	9.40019	12.327	2.9405	8.22257		Q40281	Ribulose bisphosphate carboxylase/oxygenase activase, chloroplastic OS=Malus domestica GN=RCA PE=2 SV=1	1400000	1400000	13000000	5.09677	3.91324	8.40238	5.80413
P21569	Peptidyl-prolyl cis-trans isomerase OS=Zea mays GN=CYP PE=2 SV=1	21000000	18000000	5800000	16.4503	20.1715	14.2124	16.9447		P21569	Peptidyl-prolyl cis-trans isomerase OS=Zea mays GN=CYP PE=2 SV=1	6400000	6300000	28000000	23.2995	17.6096	18.0974	19.6688
P12372	Photosystem I reaction center subunit II, chloroplastic OS=Solanum lycopersicum GN=psaD PE=2 SV=1	78000000	32000000	21000000	61.1013	35.8604	51.4588	49.4735		P12372	Photosystem I reaction center subunit II, chloroplastic OS=Solanum lycopersicum GN=psaD PE=2 SV=1	17000000	27000000	29000000	61.8894	75.4696	18.7438	52.0342
Q6Z0I4	Enoyl-[acyl-carrier-protein] reductase [NADH] 1, chloroplastic OS=Oryza sativa subsp. japonica GN=Os08g0327400 PE=2 SV=1	9600000	7900000	1200000	7.52015	8.85304	2.9405	6.4379		Q6Z0I4	Enoyl-[acyl-carrier-protein] reductase [NADH] 1, chloroplastic OS=Oryza sativa subsp. japonica GN=Os08g0327400 PE=2 SV=1	900000	1200000	15000000	3.2765	3.3542	9.69505	5.44192
P27080	ADP,ATP carrier protein OS=Chlamydomonas reinhardtii GN=ABT PE=2 SV=1	0	0	0	0	0	0	0		P27080	ADP,ATP carrier protein OS=Chlamydomonas reinhardtii GN=ABT PE=2 SV=1	90000	415000	740000	0.32765	1.16	0.478289	0.655311
Q9XFA2	Phosphoenolpyruvate carboxykinase (ATP) 2 OS=Urochloa panicoides GN=PCK2 PE=2 SV=1	4200000	5300000	1100000	3.29007	5.93938	2.69546	3.97497		Q9XFA2	Phosphoenolpyruvate carboxykinase (ATP) 2 OS=Urochloa panicoides GN=PCK2 PE=2 SV=1	0	0	0	0	0	0	0
A4QJC8	Cytochrome f OS=Aethionema cordifolium GN=petA PE=3 SV=1	120000000	46000000	790000	94.0019	51.5494	1.93583	49.1624		A4QJC8	Cytochrome f OS=Aethionema cordifolium GN=petA PE=3 SV=1	7200000	1600000	100000000	26.212	4.47227	64.6337	31.7726
Q9LSU1	Proteasome subunit alpha type-5 OS=Oryza sativa subsp. japonica GN=PAE1 PE=2 SV=1	9200000	4300000	230000	7.20681	4.81875	0.563596	4.19639		Q9LSU1	Proteasome subunit alpha type-5 OS=Oryza sativa subsp. japonica GN=PAE1 PE=2 SV=1	1700000	2600000	10000000	6.18894	7.26744	6.46337	6.63991
B3TNA5	NAD(P)H-quinone oxidoreductase subunit H, chloroplastic OS=Brachypodium distachyon GN=ndhH PE=3 SV=1	0	0	0	0	0	0	0		B3TNA5	NAD(P)H-quinone oxidoreductase subunit H, chloroplastic OS=Brachypodium distachyon GN=ndhH PE=3 SV=1	0	0	0	0	0	0	0
Q43261	Histone H2B.3 OS=Zea mays PE=3 SV=3	800000	110000	455000	0.62668	0.12327	1.11494	0.62163		Q43261	Histone H2B.3 OS=Zea mays PE=3 SV=3	445000	300000	590000	1.62005	0.838551	0.381339	0.946645
Q43433	V-type proton ATPase subunit B 2 (Fragment) OS=Gossypium hirsutum PE=2 SV=1	4400000	2900000	1300000	3.44674	3.24985	3.18554	3.29404		Q43433	V-type proton ATPase subunit B 2 (Fragment) OS=Gossypium hirsutum PE=2 SV=1	1500000	1500000	4400000	5.46083	4.19275	2.84388	4.16582
Q6ZC69	Probable adenylate kinase 2, chloroplastic OS=Oryza sativa subsp. japonica GN=Os08g0109300 PE=2 SV=1	270000	1800000	1035000	0.211504	2.01715	2.53618	1.58828		Q6ZC69	Probable adenylate kinase 2, chloroplastic OS=Oryza sativa subsp. japonica GN=Os08g0109300 PE=2 SV=1	370000	12685000	25000000	1.347	35.4567	16.1584	17.654
Q69SV0	Probable L-ascorbate peroxidase 8, chloroplastic OS=Oryza sativa subsp. japonica GN=APX8 PE=1 SV=2	3600000	270000	1935000	2.82006	0.302572	4.74156	2.6214		Q69SV0	Probable L-ascorbate peroxidase 8, chloroplastic OS=Oryza sativa subsp. japonica GN=APX8 PE=1 SV=2	0	0	0	0	0	0	0
P49398	40S ribosomal protein S4 OS=Oryza sativa subsp. japonica GN=RPS4 PE=2 SV=3	3400000	2200000	2800000	2.66339	2.4654	6.86117	3.99665		P49398	40S ribosomal protein S4 OS=Oryza sativa subsp. japonica GN=RPS4 PE=2 SV=3	380000	440000	11000000	1.38341	1.22987	7.1097	3.241
A2Y053	S-adenosylmethionine synthase 1 OS=Oryza sativa subsp. indica GN=SAM1 PE=2 SV=2	6000000	3200000	4600000	4.7001	3.58604	11.2719	6.51935		A2Y053	S-adenosylmethionine synthase 1 OS=Oryza sativa subsp. indica GN=SAM1 PE=2 SV=2	0	0	0	0	0	0	0
P0C5D5	Peroxiredoxin Q, chloroplastic OS=Oryza sativa subsp. japonica GN=Os06g0196300 PE=2 SV=1	7600000	5700000	1700000	5.95346	6.38764	4.16571	5.50227		P0C5D5	Peroxiredoxin Q, chloroplastic OS=Oryza sativa subsp. japonica GN=Os06g0196300 PE=2 SV=1	3500000	2500000	10000000	12.7419	6.98792	6.46337	8.73107
Q40073	Ribulose bisphosphate carboxylase/oxygenase activase A, chloroplastic OS=Hordeum vulgare GN=RCAA PE=2 SV=1	9000000	4500000	24000	7.05014	5.04287	0.05881	4.05061		Q40073	Ribulose bisphosphate carboxylase/oxygenase activase A, chloroplastic OS=Hordeum vulgare GN=RCAA PE=2 SV=1	230000	47000	8700000	0.837327	0.131373	5.62313	2.19728
Q2R2W2	14-3-3-like protein GF14-D OS=Oryza sativa subsp. japonica GN=GF14D PE=1 SV=1	8900000	4400000	6650000	6.97181	4.93081	16.2953	9.3993		Q2R2W2	14-3-3-like protein GF14-D OS=Oryza sativa subsp. japonica GN=GF14D PE=1 SV=1	960000	4880000	8800000	3.49493	13.6404	5.68776	7.60771
O64981	Ribulose bisphosphate carboxylase/oxygenase activase, chloroplastic OS=Phaseolus vulgaris GN=RCA1 PE=2 SV=1	17000000	3200000	2600000	13.3169	3.58604	6.37108	7.75802		O64981	Ribulose bisphosphate carboxylase/oxygenase activase, chloroplastic OS=Phaseolus vulgaris GN=RCA1 PE=2 SV=1	140000	100000	98000000	0.509677	0.279517	63.341	21.3767
Q6YZX6	Putative aconitate hydratase, cytoplasmic OS=Oryza sativa subsp. japonica GN=Os08g0191100 PE=3 SV=1	4100000	2800000	210000	3.21173	3.13779	0.514588	2.28804		Q6YZX6	Putative aconitate hydratase, cytoplasmic OS=Oryza sativa subsp. japonica GN=Os08g0191100 PE=3 SV=1	0	0	0	0	0	0	0
P93407	Superoxide dismutase [Cu-Zn], chloroplastic OS=Oryza sativa subsp. japonica GN=SODCP PE=1 SV=1	38000000	2700000	16000000	29.7673	3.02572	39.2067	23.9999		P93407	Superoxide dismutase [Cu-Zn], chloroplastic OS=Oryza sativa subsp. japonica GN=SODCP PE=1 SV=1	20000000	16000000	140000000	72.811	44.7227	90.4871	69.3403
Q35322	NADH dehydrogenase [ubiquinone] iron-sulfur protein 3 OS=Oryza sativa subsp. japonica GN=NAD9 PE=2 SV=2	8000000	5200000	1600000	6.2668	5.82732	3.92067	5.33826		Q35322	NADH dehydrogenase [ubiquinone] iron-sulfur protein 3 OS=Oryza sativa subsp. japonica GN=NAD9 PE=2 SV=2	1600000	2500000	11000000	5.82488	6.98792	7.1097	6.64084
P27081	ADP,ATP carrier protein, mitochondrial (Fragment) OS=Solanum tuberosum GN=ANT1 PE=2 SV=1	0	0	0	0	0	0	0		P27081	ADP,ATP carrier protein, mitochondrial (Fragment) OS=Solanum tuberosum GN=ANT1 PE=2 SV=1	905000	310000	1500000	3.2947	0.866502	0.969505	1.71024
P20904	Actin OS=Volvox carteri PE=3 SV=1	1000000	2700000	360000	0.783349	3.02572	0.88215	1.56374		P20904	Actin OS=Volvox carteri PE=3 SV=1	1000000	1500000	9400000	3.64055	4.19275	6.07556	4.63629
P52588	Protein disulfide-isomerase OS=Zea mays GN=PDI PE=2 SV=1	5000000	3100000	640000	3.91675	3.47398	1.56827	2.98633		P52588	Protein disulfide-isomerase OS=Zea mays GN=PDI PE=2 SV=1	970000	450000	4700000	3.53133	1.25783	3.03778	2.60898
Q08480	Adenylate kinase 4 OS=Oryza sativa subsp. japonica GN=ADK-B PE=2 SV=1	19000000	1600000	1200000	14.8836	1.79302	2.9405	6.53905		Q08480	Adenylate kinase 4 OS=Oryza sativa subsp. japonica GN=ADK-B PE=2 SV=1	1000000	1400000	22000000	3.64055	3.91324	14.2194	7.25773
O49079	Oxygen-evolving enhancer protein 1, chloroplastic OS=Fritillaria agrestis GN=PSBO PE=2 SV=1	280000000	100000000	51000000	219.338	112.064	124.971	152.124		O49079	Oxygen-evolving enhancer protein 1, chloroplastic OS=Fritillaria agrestis GN=PSBO PE=2 SV=1	45000000	850000	22925000	163.825	2.37589	14.8173	60.3393
P19950	40S ribosomal protein S14 OS=Zea mays PE=3 SV=1	11000000	7400000	2100000	8.61684	8.29272	5.14588	7.35181		P19950	40S ribosomal protein S14 OS=Zea mays PE=3 SV=1	2100000	4800000	27000000	7.64516	13.4168	17.4511	12.8377
P41346	Ferredoxin--NADP reductase, chloroplastic OS=Vicia faba GN=PETH PE=2 SV=1	38000000	16000000	120000	29.7673	17.9302	0.29405	15.9972		P41346	Ferredoxin--NADP reductase, chloroplastic OS=Vicia faba GN=PETH PE=2 SV=1	4500000	45000	40000000	16.3825	0.125783	25.8535	14.1206
Q69S39	Cytochrome b6-f complex iron-sulfur subunit, chloroplastic OS=Oryza sativa subsp. japonica GN=petC PE=1 SV=1	16000000	6700000	6700000	12.5336	7.50828	16.4178	12.1532		Q69S39	Cytochrome b6-f complex iron-sulfur subunit, chloroplastic OS=Oryza sativa subsp. japonica GN=petC PE=1 SV=1	3600000	4100000	24000000	13.106	11.4602	15.5121	13.3594
Q9ZTP5	Ribulose-phosphate 3-epimerase, chloroplastic OS=Oryza sativa subsp. japonica GN=RPE PE=1 SV=2	1700000	1100000	1400000	1.33169	1.2327	3.43058	1.99833		Q9ZTP5	Ribulose-phosphate 3-epimerase, chloroplastic OS=Oryza sativa subsp. japonica GN=RPE PE=1 SV=2	0	0	0	0	0	0	0
Q9T074	Phosphoenolpyruvate carboxykinase (ATP) OS=Arabidopsis thaliana GN=PCKA PE=1 SV=1	64000000	32000000	250000	50.1344	35.8604	0.612604	28.8691		Q9T074	Phosphoenolpyruvate carboxykinase (ATP) OS=Arabidopsis thaliana GN=PCKA PE=1 SV=1	1300000	15650000	30000000	4.73272	43.7444	19.3901	22.6224
O22424	40S ribosomal protein S4 OS=Zea mays GN=RPS4 PE=2 SV=1	0	0	0	0	0	0	0		O22424	40S ribosomal protein S4 OS=Zea mays GN=RPS4 PE=2 SV=1	410000	1400000	11000000	1.49263	3.91324	7.1097	4.17186
P15252	Rubber elongation factor protein OS=Hevea brasiliensis PE=1 SV=2	39000000	26000000	5000000	30.5506	29.1366	12.2521	23.9798		P15252	Rubber elongation factor protein OS=Hevea brasiliensis PE=1 SV=2	11000000	6400000	33000000	40.0461	17.8891	21.3291	26.4214
Q05761	40S ribosomal protein S13 OS=Zea mays GN=RPS13 PE=2 SV=1	980000	660000	160000	0.767682	0.739621	0.392067	0.633123		Q05761	40S ribosomal protein S13 OS=Zea mays GN=RPS13 PE=2 SV=1	985000	470000	1500000	3.58594	1.31373	0.969505	1.95639
Q43206	Catalase-1 OS=Triticum aestivum GN=CAT1 PE=2 SV=1	11000000	6700000	930000	8.61684	7.50828	2.27889	6.13467		Q43206	Catalase-1 OS=Triticum aestivum GN=CAT1 PE=2 SV=1	1200000	940000	11000000	4.36866	2.62746	7.1097	4.70194
P14655	Glutamine synthetase, chloroplastic OS=Oryza sativa subsp. japonica GN=GLN2 PE=1 SV=1	1500000	1500000	1500000	1.17502	1.68096	3.67563	2.1772		P14655	Glutamine synthetase, chloroplastic OS=Oryza sativa subsp. japonica GN=GLN2 PE=1 SV=1	0	0	0	0	0	0	0
P0C355	Photosystem I P700 chlorophyll a apoprotein A1 OS=Oryza sativa subsp. japonica GN=psaA PE=3 SV=1	80000000	54000000	62000000	62.668	60.5145	151.926	91.7028		P0C355	Photosystem I P700 chlorophyll a apoprotein A1 OS=Oryza sativa subsp. japonica GN=psaA PE=3 SV=1	38000000	37000000	41000000	138.341	103.421	26.4998	89.4207
Q6K9N6	Succinate--CoA ligase [ADP-forming] subunit beta, mitochondrial OS=Oryza sativa subsp. japonica GN=Os02g0621700 PE=1 SV=1	8000000	7400000	940000	6.2668	8.29272	2.30339	5.62097		Q6K9N6	Succinate--CoA ligase [ADP-forming] subunit beta, mitochondrial OS=Oryza sativa subsp. japonica GN=Os02g0621700 PE=1 SV=1	1400000	1100000	5300000	5.09677	3.07469	3.42558	3.86568
A2WXV8	Fructokinase-1 OS=Oryza sativa subsp. indica GN=FRK1 PE=1 SV=1	4400000	2800000	620000	3.44674	3.13779	1.51926	2.70126		A2WXV8	Fructokinase-1 OS=Oryza sativa subsp. indica GN=FRK1 PE=1 SV=1	610000	910000	5800000	2.22074	2.5436	3.74875	2.8377
P15194	Chlorophyll a-b binding protein type 2 member 1B, chloroplastic OS=Pinus sylvestris PE=2 SV=1	0	0	0	0	0	0	0		P15194	Chlorophyll a-b binding protein type 2 member 1B, chloroplastic OS=Pinus sylvestris PE=2 SV=1	0	0	0	0	0	0	0
Q9LI00	6-phosphogluconate dehydrogenase, decarboxylating 1 OS=Oryza sativa subsp. japonica GN=G6PGH1 PE=2 SV=1	5000000	4100000	460000	3.91675	4.59462	1.12719	3.21285		Q9LI00	6-phosphogluconate dehydrogenase, decarboxylating 1 OS=Oryza sativa subsp. japonica GN=G6PGH1 PE=2 SV=1	730000	300000	4000000	2.6576	0.838551	2.58535	2.02717
P18123	Catalase isozyme 3 OS=Zea mays GN=CAT3 PE=2 SV=2	7700000	3400000	0	6.03179	3.81017	0	3.28065		P18123	Catalase isozyme 3 OS=Zea mays GN=CAT3 PE=2 SV=2	340000	150000	3700000	1.23779	0.419275	2.39145	1.3495
P46722	NAD(P)H-quinone oxidoreductase subunit I, chloroplastic OS=Zea mays GN=ndhI PE=3 SV=1	0	0	0	0	0	0	0		P46722	NAD(P)H-quinone oxidoreductase subunit I, chloroplastic OS=Zea mays GN=ndhI PE=3 SV=1	0	0	0	0	0	0	0
Q6ZL94	Succinate--CoA ligase [ADP-forming] subunit alpha, mitochondrial OS=Oryza sativa subsp. japonica GN=Os07g0577700 PE=1 SV=1	7800000	6800000	1400000	6.11013	7.62034	3.43058	5.72035		Q6ZL94	Succinate--CoA ligase [ADP-forming] subunit alpha, mitochondrial OS=Oryza sativa subsp. japonica GN=Os07g0577700 PE=1 SV=1	680000	1300000	2200000	2.47557	3.63372	1.42194	2.51041
Q10KF0	Proteasome subunit alpha type-2 OS=Oryza sativa subsp. japonica GN=PAB1 PE=2 SV=1	6800000	3200000	5000000	5.32678	3.58604	12.2521	7.05497		Q10KF0	Proteasome subunit alpha type-2 OS=Oryza sativa subsp. japonica GN=PAB1 PE=2 SV=1	2300000	6600000	13000000	8.37327	18.4481	8.40238	11.7413
P25076	Cytochrome c1-1, heme protein, mitochondrial OS=Solanum tuberosum GN=CYCL PE=2 SV=1	32000000	4700000	1800000	25.0672	5.267	4.41075	11.5816		P25076	Cytochrome c1-1, heme protein, mitochondrial OS=Solanum tuberosum GN=CYCL PE=2 SV=1	6000000	6800000	41000000	21.8433	19.0072	26.4998	22.4501
Q6AVT2	Glucose-1-phosphate adenylyltransferase large subunit 1, chloroplastic/amyloplastic OS=Oryza sativa subsp. japonica GN=AGPL1 PE=1 SV=1	6800000	1200000	5550000	5.32678	1.34477	13.5998	6.75712		Q6AVT2	Glucose-1-phosphate adenylyltransferase large subunit 1, chloroplastic/amyloplastic OS=Oryza sativa subsp. japonica GN=AGPL1 PE=1 SV=1	0	0	0	0	0	0	0
Q6ATY4	UPF0603 protein Os05g0401100, chloroplastic OS=Oryza sativa subsp. japonica GN=Os05g0401100 PE=3 SV=1	10000000	4700000	1800000	7.83349	5.267	4.41075	5.83708		Q6ATY4	UPF0603 protein Os05g0401100, chloroplastic OS=Oryza sativa subsp. japonica GN=Os05g0401100 PE=3 SV=1	3800000	2400000	17000000	13.8341	6.70841	10.9877	10.5101
A2XJ35	Chlorophyll a-b binding protein, chloroplastic OS=Oryza sativa subsp. indica GN=OsI_012078 PE=2 SV=1	640000000	290000000	460000000	501.344	324.985	1127.19	651.173		A2XJ35	Chlorophyll a-b binding protein, chloroplastic OS=Oryza sativa subsp. indica GN=OsI_012078 PE=2 SV=1	300000000	520000000	850000000	1092.17	1453.49	549.386	1031.68
P25462	Glutamine synthetase, chloroplastic OS=Zea mays GN=GLN2 PE=2 SV=1	46000000	45000000	11000000	36.0341	50.4287	26.9546	37.8058		P25462	Glutamine synthetase, chloroplastic OS=Zea mays GN=GLN2 PE=2 SV=1	7300000	10000000	47000000	26.576	27.9517	30.3778	28.3018
P00412	Cytochrome c oxidase subunit 2 OS=Zea mays GN=COX2 PE=2 SV=4	27000000	5300000	1700000	21.1504	5.93938	4.16571	10.4185		P00412	Cytochrome c oxidase subunit 2 OS=Zea mays GN=COX2 PE=2 SV=4	10100000	1200000	19000000	36.7696	3.3542	12.2804	17.4681
P18492	Glutamate-1-semialdehyde 2,1-aminomutase, chloroplastic OS=Hordeum vulgare GN=GSA PE=1 SV=3	1500000	1900000	1700000	1.17502	2.12921	4.16571	2.48998		P18492	Glutamate-1-semialdehyde 2,1-aminomutase, chloroplastic OS=Hordeum vulgare GN=GSA PE=1 SV=3	0	0	0	0	0	0	0
Q32RQ1	Ribulose bisphosphate carboxylase large chain OS=Zygnema circumcarinatum GN=rbcL PE=3 SV=1	0	0	0	0	0	0	0		Q32RQ1	Ribulose bisphosphate carboxylase large chain OS=Zygnema circumcarinatum GN=rbcL PE=3 SV=1	0	0	0	0	0	0	0
P50300	S-adenosylmethionine synthase OS=Pinus banksiana GN=METK PE=2 SV=1	16000000	13000000	2800000	12.5336	14.5683	6.86117	11.321		P50300	S-adenosylmethionine synthase OS=Pinus banksiana GN=METK PE=2 SV=1	2000000	3100000	22000000	7.2811	8.66502	14.2194	10.0552
P51821	ADP-ribosylation factor 1 OS=Chlamydomonas reinhardtii GN=ARF1 PE=2 SV=2	3800000	5100000	520000	2.97673	5.71526	1.27422	3.32207		P51821	ADP-ribosylation factor 1 OS=Chlamydomonas reinhardtii GN=ARF1 PE=2 SV=2	710000	1700000	9000000	2.58479	4.75179	5.81703	4.38454
P12332	Chlorophyll a-b binding protein, chloroplastic (Fragment) OS=Silene latifolia subsp. alba PE=2 SV=2	0	0	0	0	0	0	0		P12332	Chlorophyll a-b binding protein, chloroplastic (Fragment) OS=Silene latifolia subsp. alba PE=2 SV=2	0	0	0	0	0	0	0
P41980	Superoxide dismutase [Mn] 3.4, mitochondrial OS=Zea mays GN=SODA.3 PE=2 SV=1	16000000	11000000	11000000	12.5336	12.327	26.9546	17.2717		P41980	Superoxide dismutase [Mn] 3.4, mitochondrial OS=Zea mays GN=SODA.3 PE=2 SV=1	7800000	11900000	16000000	28.3963	33.2625	10.3414	24.0001
O23813	Sulfite reductase [ferredoxin], chloroplastic OS=Zea mays GN=SIR PE=1 SV=1	3300000	3500000	930000	2.58505	3.92223	2.27889	2.92872		O23813	Sulfite reductase [ferredoxin], chloroplastic OS=Zea mays GN=SIR PE=1 SV=1	0	0	0	0	0	0	0
A0A365	Cytochrome b6 OS=Coffea arabica GN=petB PE=3 SV=1	27000000	27000000	22000000	21.1504	30.2572	53.9092	35.1056		A0A365	Cytochrome b6 OS=Coffea arabica GN=petB PE=3 SV=1	12000000	14000000	24000000	43.6866	39.1324	15.5121	32.777
A2XIK9	Magnesium-chelatase subunit ChlI, chloroplastic OS=Oryza sativa subsp. indica GN=CHLI PE=3 SV=1	700000	970000	835000	0.548345	1.08702	2.0461	1.22715		A2XIK9	Magnesium-chelatase subunit ChlI, chloroplastic OS=Oryza sativa subsp. indica GN=CHLI PE=3 SV=1	290000	240000	3000000	1.05576	0.670841	1.93901	1.22187
Q2QM69	2-methyl-6-phytyl-1,4-hydroquinone methyltransferase 2, chloroplastic OS=Oryza sativa subsp. japonica GN=Os12g0615400 PE=2 SV=2	9400000	3100000	6250000	7.36348	3.47398	15.3151	8.71752		Q2QM69	2-methyl-6-phytyl-1,4-hydroquinone methyltransferase 2, chloroplastic OS=Oryza sativa subsp. japonica GN=Os12g0615400 PE=2 SV=2	450000	1300000	11000000	1.63825	3.63372	7.1097	4.12722
A5H8G4	Peroxidase 1 OS=Zea mays GN=PER1 PE=1 SV=1	43000000	160000000	67000000	33.684	179.302	164.178	125.721		A5H8G4	Peroxidase 1 OS=Zea mays GN=PER1 PE=1 SV=1	52000000	69000000	63000000	189.309	192.867	40.7192	140.965
O22518	40S ribosomal protein SA OS=Glycine max PE=2 SV=1	50000000	31000000	7500000	39.1675	34.7398	18.3781	30.7618		O22518	40S ribosomal protein SA OS=Glycine max PE=2 SV=1	6900000	9000000	84000000	25.1198	25.1565	54.2923	34.8562
Q9C9W5	Glycerate dehydrogenase HPR, peroxisomal OS=Arabidopsis thaliana GN=HPR PE=1 SV=1	11000000	16000000	2800000	8.61684	17.9302	6.86117	11.1361		Q9C9W5	Glycerate dehydrogenase HPR, peroxisomal OS=Arabidopsis thaliana GN=HPR PE=1 SV=1	1100000	2900000	12000000	4.00461	8.10599	7.75604	6.62221
P34823	Elongation factor 1-alpha OS=Daucus carota PE=2 SV=1	2300000	1600000	1950000	1.8017	1.79302	4.77831	2.79101		P34823	Elongation factor 1-alpha OS=Daucus carota PE=2 SV=1	0	0	0	0	0	0	0
P40978	40S ribosomal protein S19 OS=Oryza sativa subsp. japonica GN=RPS19A PE=2 SV=1	23000000	19000000	6300000	18.017	21.2921	15.4376	18.2489		P40978	40S ribosomal protein S19 OS=Oryza sativa subsp. japonica GN=RPS19A PE=2 SV=1	6300000	11000000	44000000	22.9355	30.7469	28.4388	27.3737
P38559	Glutamine synthetase root isozyme 1 OS=Zea mays GN=GLN6 PE=2 SV=1	0	0	0	0	0	0	0		P38559	Glutamine synthetase root isozyme 1 OS=Zea mays GN=GLN6 PE=2 SV=1	0	0	0	0	0	0	0
Q9FHQ6	Polyubiquitin 9 OS=Arabidopsis thaliana GN=UBQ9 PE=3 SV=1	5400000	3300000	1700000	4.23009	3.69811	4.16571	4.0313		Q9FHQ6	Polyubiquitin 9 OS=Arabidopsis thaliana GN=UBQ9 PE=3 SV=1	1600000	2900000	6500000	5.82488	8.10599	4.20119	6.04402
O81154	Cysteine synthase OS=Solanum tuberosum PE=2 SV=1	0	0	0	0	0	0	0		O81154	Cysteine synthase OS=Solanum tuberosum PE=2 SV=1	0	0	0	0	0	0	0
P0C341	NAD(P)H-quinone oxidoreductase subunit K, chloroplastic OS=Oryza sativa GN=ndhK PE=3 SV=2	20000000	4900000	1100000	15.667	5.49113	2.69546	7.95119		P0C341	NAD(P)H-quinone oxidoreductase subunit K, chloroplastic OS=Oryza sativa GN=ndhK PE=3 SV=2	2900000	1600000	14000000	10.5576	4.47227	9.04871	8.02619
O24573	60S acidic ribosomal protein P0 OS=Zea mays GN=RP-P0 PE=1 SV=3	15000000	7900000	1300000	11.7502	8.85304	3.18554	7.92961		O24573	60S acidic ribosomal protein P0 OS=Zea mays GN=RP-P0 PE=1 SV=3	3200000	3900000	11000000	11.6498	10.9012	7.1097	9.88688
A8Y9C3	50S ribosomal protein L14, chloroplastic OS=Lolium perenne GN=rpl14 PE=3 SV=1	5400000	3700000	840000	4.23009	4.14636	2.05835	3.47827		A8Y9C3	50S ribosomal protein L14, chloroplastic OS=Lolium perenne GN=rpl14 PE=3 SV=1	740000	1400000	9800000	2.69401	3.91324	6.3341	4.31378
Q9SQL2	Chlorophyll a-b binding protein P4, chloroplastic OS=Pisum sativum GN=lhcA-P4 PE=1 SV=1	0	0	0	0	0	0	0		Q9SQL2	Chlorophyll a-b binding protein P4, chloroplastic OS=Pisum sativum GN=lhcA-P4 PE=1 SV=1	190000	2145000	4100000	0.691705	5.99564	2.64998	3.11244
Q8LK61	NADP-dependent glyceraldehyde-3-phosphate dehydrogenase OS=Triticum aestivum GN=GAPN PE=1 SV=2	3900000	2200000	3050000	3.05506	2.4654	7.47377	4.33141		Q8LK61	NADP-dependent glyceraldehyde-3-phosphate dehydrogenase OS=Triticum aestivum GN=GAPN PE=1 SV=2	0	0	0	0	0	0	0
Q8LAH8	Nucleoside diphosphate kinase IV, chloroplastic/mitochondrial OS=Arabidopsis thaliana GN=NDK4 PE=1 SV=2	22000000	20000000	3400000	17.2337	22.4128	8.33142	15.9926		Q8LAH8	Nucleoside diphosphate kinase IV, chloroplastic/mitochondrial OS=Arabidopsis thaliana GN=NDK4 PE=1 SV=2	23150000	3300000	43000000	84.2788	9.22406	27.7925	40.4318
P93306	NADH dehydrogenase [ubiquinone] iron-sulfur protein 2 OS=Arabidopsis thaliana GN=NAD7 PE=1 SV=2	3600000	5300000	700000	2.82006	5.93938	1.71529	3.49158		P93306	NADH dehydrogenase [ubiquinone] iron-sulfur protein 2 OS=Arabidopsis thaliana GN=NAD7 PE=1 SV=2	360000	370000	1200000	1.3106	1.03421	0.775604	1.04014
P84209	Malate dehydrogenase, mitochondrial (Fragments) OS=Imperata cylindrica PE=1 SV=1	6300000	1000000	3650000	4.9351	1.12064	8.94402	4.99992		P84209	Malate dehydrogenase, mitochondrial (Fragments) OS=Imperata cylindrica PE=1 SV=1	0	0	0	0	0	0	0
Q01899	Heat shock 70 kDa protein, mitochondrial OS=Phaseolus vulgaris PE=2 SV=1	25000000	15000000	20000000	19.5837	16.8096	49.0083	28.4672		Q01899	Heat shock 70 kDa protein, mitochondrial OS=Phaseolus vulgaris PE=2 SV=1	0	0	0	0	0	0	0
A2YXU2	Proteasome subunit alpha type-7-A OS=Oryza sativa subsp. indica GN=OsI_029135 PE=2 SV=2	0	0	0	0	0	0	0		A2YXU2	Proteasome subunit alpha type-7-A OS=Oryza sativa subsp. indica GN=OsI_029135 PE=2 SV=2	370000	1000000	5200000	1.347	2.79517	3.36095	2.50104
Q41738	Thiamine thiazole synthase 1, chloroplastic OS=Zea mays GN=THI1-1 PE=2 SV=1	830000	470000	650000	0.65018	0.5267	1.59277	0.923217		Q41738	Thiamine thiazole synthase 1, chloroplastic OS=Zea mays GN=THI1-1 PE=2 SV=1	1200000	1600000	6300000	4.36866	4.47227	4.07192	4.30428
O65731	40S ribosomal protein S5 (Fragment) OS=Cicer arietinum GN=RPS5 PE=2 SV=1	17000000	12000000	870000	13.3169	13.4477	2.13186	9.63215		O65731	40S ribosomal protein S5 (Fragment) OS=Cicer arietinum GN=RPS5 PE=2 SV=1	3500000	600000	19000000	12.7419	1.6771	12.2804	8.89981
Q6XZ79	Fructokinase-1 OS=Zea mays GN=FRK1 PE=1 SV=1	400000	630000	160000	0.31334	0.706002	0.392067	0.47047		Q6XZ79	Fructokinase-1 OS=Zea mays GN=FRK1 PE=1 SV=1	1095000	790000	1400000	3.9864	2.20818	0.904871	2.36649
O48556	Soluble inorganic pyrophosphatase OS=Zea mays GN=IPP PE=2 SV=1	0	0	0	0	0	0	0		O48556	Soluble inorganic pyrophosphatase OS=Zea mays GN=IPP PE=2 SV=1	1481000	62000	2900000	5.39166	0.1733	1.87438	2.47978
A3BLC3	Ribosome-recycling factor, chloroplastic OS=Oryza sativa subsp. japonica GN=Os07g0570700 PE=2 SV=2	3300000	2100000	2700000	2.58505	2.35334	6.61613	3.85151		A3BLC3	Ribosome-recycling factor, chloroplastic OS=Oryza sativa subsp. japonica GN=Os07g0570700 PE=2 SV=2	660000	3180000	5700000	2.40276	8.88864	3.68412	4.99184
P26518	Glyceraldehyde-3-phosphate dehydrogenase, cytosolic OS=Magnolia liliiflora GN=GAPC PE=2 SV=1	7700000	5300000	6500000	6.03179	5.93938	15.9277	9.29963		P26518	Glyceraldehyde-3-phosphate dehydrogenase, cytosolic OS=Magnolia liliiflora GN=GAPC PE=2 SV=1	0	0	0	0	0	0	0
P40393	Ras-related protein RIC2 OS=Oryza sativa subsp. japonica GN=RIC2 PE=2 SV=2	1600000	940000	790000	1.25336	1.0534	1.93583	1.4142		P40393	Ras-related protein RIC2 OS=Oryza sativa subsp. japonica GN=RIC2 PE=2 SV=2	870000	1700000	5000000	3.16728	4.75179	3.23168	3.71692
O22609	Protease Do-like 1, chloroplastic OS=Arabidopsis thaliana GN=DEGP1 PE=1 SV=2	4700000	4800000	2200000	3.68174	5.37906	5.39092	4.81724		O22609	Protease Do-like 1, chloroplastic OS=Arabidopsis thaliana GN=DEGP1 PE=1 SV=2	0	0	0	0	0	0	0
Q43272	NADP-dependent glyceraldehyde-3-phosphate dehydrogenase OS=Zea mays GN=GPN1 PE=2 SV=1	4600000	1800000	3200000	3.60341	2.01715	7.84133	4.4873		Q43272	NADP-dependent glyceraldehyde-3-phosphate dehydrogenase OS=Zea mays GN=GPN1 PE=2 SV=1	0	0	0	0	0	0	0
P04782	Chlorophyll a-b binding protein 25, chloroplastic OS=Petunia sp. GN=CAB25 PE=3 SV=1	0	0	0	0	0	0	0		P04782	Chlorophyll a-b binding protein 25, chloroplastic OS=Petunia sp. GN=CAB25 PE=3 SV=1	0	0	0	0	0	0	0
P51427	40S ribosomal protein S5-2 OS=Arabidopsis thaliana GN=RPS5B PE=1 SV=2	0	0	0	0	0	0	0		P51427	40S ribosomal protein S5-2 OS=Arabidopsis thaliana GN=RPS5B PE=1 SV=2	0	0	0	0	0	0	0
A7Y3F5	Cytochrome f OS=Ipomoea purpurea GN=petA PE=3 SV=1	0	0	0	0	0	0	0		A7Y3F5	Cytochrome f OS=Ipomoea purpurea GN=petA PE=3 SV=1	0	0	0	0	0	0	0
Q6Z965	12-oxophytodienoate reductase 7 OS=Oryza sativa subsp. japonica GN=OPR7 PE=2 SV=1	1500000	2300000	550000	1.17502	2.57747	1.34773	1.70007		Q6Z965	12-oxophytodienoate reductase 7 OS=Oryza sativa subsp. japonica GN=OPR7 PE=2 SV=1	0	0	0	0	0	0	0
Q00914	Photosystem I iron-sulfur center OS=Chlamydomonas reinhardtii GN=psaC PE=1 SV=2	31000000	20000000	4500000	24.2838	22.4128	11.0269	19.2412		Q00914	Photosystem I iron-sulfur center OS=Chlamydomonas reinhardtii GN=psaC PE=1 SV=2	4600000	3800000	30000000	16.7465	10.6216	19.3901	15.5861
Q6ZBZ2	Germin-like protein 8-14 OS=Oryza sativa subsp. japonica GN=GER5 PE=1 SV=1	76000000	14000000	41000000	59.5346	15.6889	100.467	58.5635		Q6ZBZ2	Germin-like protein 8-14 OS=Oryza sativa subsp. japonica GN=GER5 PE=1 SV=1	16000000	69000000	170000000	58.2488	192.867	109.877	120.331
P17606	Malate dehydrogenase [NADP] 1, chloroplastic OS=Sorghum bicolor PE=1 SV=1	2900000	1200000	2050000	2.27171	1.34477	5.02335	2.87994		P17606	Malate dehydrogenase [NADP] 1, chloroplastic OS=Sorghum bicolor PE=1 SV=1	0	0	0	0	0	0	0
P49690	60S ribosomal protein L23 OS=Arabidopsis thaliana GN=RPL23A PE=2 SV=3	1100000	1200000	1150000	0.861684	1.34477	2.81798	1.67481		P49690	60S ribosomal protein L23 OS=Arabidopsis thaliana GN=RPL23A PE=2 SV=3	0	0	0	0	0	0	0
O23979	Soluble inorganic pyrophosphatase OS=Hordeum vulgare subsp. vulgare GN=IPP PE=2 SV=1	11000000	1200000	6100000	8.61684	1.34477	14.9475	8.30305		O23979	Soluble inorganic pyrophosphatase OS=Hordeum vulgare subsp. vulgare GN=IPP PE=2 SV=1	0	0	0	0	0	0	0
A1E9V3	Photosystem II reaction center protein H OS=Sorghum bicolor GN=psbH PE=3 SV=1	52000000	20000000	9600000	40.7342	22.4128	23.524	28.8903		A1E9V3	Photosystem II reaction center protein H OS=Sorghum bicolor GN=psbH PE=3 SV=1	12000000	6700000	58000000	43.6866	18.7276	37.4875	33.3006
Q05737	GTP-binding protein YPTM2 OS=Zea mays GN=YPTM2 PE=2 SV=1	490000	580000	480000	0.383841	0.64997	1.1762	0.736671		Q05737	GTP-binding protein YPTM2 OS=Zea mays GN=YPTM2 PE=2 SV=1	1025000	250000	1800000	3.73156	0.698792	1.16341	1.86459
Q9SRZ6	Cytosolic isocitrate dehydrogenase [NADP] OS=Arabidopsis thaliana GN=CICDH PE=2 SV=1	1500000	1800000	250000	1.17502	2.01715	0.612604	1.26826		Q9SRZ6	Cytosolic isocitrate dehydrogenase [NADP] OS=Arabidopsis thaliana GN=CICDH PE=2 SV=1	61000	170000	900000	0.222074	0.475179	0.581703	0.426318
Q6K548	Mitochondrial outer membrane protein porin 1 OS=Oryza sativa subsp. japonica GN=VDAC1 PE=1 SV=3	13000000	2500000	7750000	10.1835	2.8016	18.9907	10.6586		Q6K548	Mitochondrial outer membrane protein porin 1 OS=Oryza sativa subsp. japonica GN=VDAC1 PE=1 SV=3	0	0	0	0	0	0	0
Q6QPJ6	Peroxiredoxin Q, chloroplastic OS=Populus jackii GN=PRXQ PE=1 SV=1	0	0	0	0	0	0	0		Q6QPJ6	Peroxiredoxin Q, chloroplastic OS=Populus jackii GN=PRXQ PE=1 SV=1	0	0	0	0	0	0	0
Q6H6D2	Porphobilinogen deaminase, chloroplastic OS=Oryza sativa subsp. japonica GN=HEMC PE=2 SV=1	4700000	4700000	1100000	3.68174	5.267	2.69546	3.8814		Q6H6D2	Porphobilinogen deaminase, chloroplastic OS=Oryza sativa subsp. japonica GN=HEMC PE=2 SV=1	990000	1700000	9100000	3.60415	4.75179	5.88166	4.74587
Q7F8S5	Peroxiredoxin-2E-2, chloroplastic OS=Oryza sativa subsp. japonica GN=PRXIIE-2 PE=1 SV=1	16000000	15000000	5800000	12.5336	16.8096	14.2124	14.5185		Q7F8S5	Peroxiredoxin-2E-2, chloroplastic OS=Oryza sativa subsp. japonica GN=PRXIIE-2 PE=1 SV=1	3500000	7700000	27000000	12.7419	21.5228	17.4511	17.2386
O23877	Ferredoxin--NADP reductase, embryo isozyme, chloroplastic OS=Oryza sativa subsp. japonica GN=Os07g0147900 PE=1 SV=1	1500000	770000	1135000	1.17502	0.862892	2.78122	1.60638		O23877	Ferredoxin--NADP reductase, embryo isozyme, chloroplastic OS=Oryza sativa subsp. japonica GN=Os07g0147900 PE=1 SV=1	0	0	0	0	0	0	0
Q6ZFU6	Thioredoxin reductase NTRB OS=Oryza sativa subsp. japonica GN=NTRB PE=2 SV=1	7200000	2900000	1050000	5.64012	3.24985	2.57294	3.82097		Q6ZFU6	Thioredoxin reductase NTRB OS=Oryza sativa subsp. japonica GN=NTRB PE=2 SV=1	0	0	0	0	0	0	0
P92963	Ras-related protein RABB1c OS=Arabidopsis thaliana GN=RABB1C PE=1 SV=1	1700000	1300000	510000	1.33169	1.45683	1.24971	1.34608		P92963	Ras-related protein RABB1c OS=Arabidopsis thaliana GN=RABB1C PE=1 SV=1	720000	1400000	3900000	2.6212	3.91324	2.52071	3.01838
P27489	Chlorophyll a-b binding protein 13, chloroplastic OS=Solanum lycopersicum GN=CAB13 PE=1 SV=1	51000000	35000000	51000000	39.9508	39.2223	124.971	68.0481		P27489	Chlorophyll a-b binding protein 13, chloroplastic OS=Solanum lycopersicum GN=CAB13 PE=1 SV=1	21000000	48000000	59000000	76.4516	134.168	38.1339	82.9178
Q7XPL2	Oxygen-dependent coproporphyrinogen-III oxidase, chloroplastic OS=Oryza sativa subsp. japonica GN=CPX PE=2 SV=2	1900000	1800000	1850000	1.48836	2.01715	4.53327	2.67959		Q7XPL2	Oxygen-dependent coproporphyrinogen-III oxidase, chloroplastic OS=Oryza sativa subsp. japonica GN=CPX PE=2 SV=2	980000	60000	1900000	3.56774	0.16771	1.22804	1.6545
P49210	60S ribosomal protein L9 OS=Oryza sativa subsp. japonica GN=RPL9 PE=2 SV=3	1200000	1200000	1200000	0.940019	1.34477	2.9405	1.74176		P49210	60S ribosomal protein L9 OS=Oryza sativa subsp. japonica GN=RPL9 PE=2 SV=3	860000	1100000	4900000	3.13087	3.07469	3.16705	3.1242
P69390	Cytochrome b559 subunit alpha OS=Hordeum vulgare GN=psbE PE=1 SV=2	8600000	4500000	200000	6.7368	5.04287	0.490083	4.08992		P69390	Cytochrome b559 subunit alpha OS=Hordeum vulgare GN=psbE PE=1 SV=2	2400000	5650000	8900000	8.73732	15.7927	5.7524	10.0941
P46225	Triosephosphate isomerase, chloroplastic OS=Secale cereale PE=1 SV=1	4300000	970000	380000	3.3684	1.08702	0.931158	1.79553		P46225	Triosephosphate isomerase, chloroplastic OS=Secale cereale PE=1 SV=1	290000	690000	2800000	1.05576	1.92867	1.80974	1.59806
A6N0M9	Nucleoside diphosphate kinase 1 OS=Oryza sativa subsp. indica GN=NDKR PE=1 SV=1	4700000	5100000	7250000	3.68174	5.71526	17.7655	9.05417		A6N0M9	Nucleoside diphosphate kinase 1 OS=Oryza sativa subsp. indica GN=NDKR PE=1 SV=1	410000	150000	16000000	1.49263	0.419275	10.3414	4.08443
Q9LSU0	Proteasome subunit alpha type-3 OS=Oryza sativa subsp. japonica GN=PAG1 PE=2 SV=1	2600000	570000	170000	2.03671	0.638764	0.416571	1.03068		Q9LSU0	Proteasome subunit alpha type-3 OS=Oryza sativa subsp. japonica GN=PAG1 PE=2 SV=1	1135000	270000	2000000	4.13203	0.754696	1.29267	2.0598
Q9SMB1	Spermidine synthase 1 OS=Oryza sativa subsp. japonica GN=SPDSYN1 PE=2 SV=1	6700000	6100000	1800000	5.24844	6.83589	4.41075	5.49836		Q9SMB1	Spermidine synthase 1 OS=Oryza sativa subsp. japonica GN=SPDSYN1 PE=2 SV=1	1300000	1100000	5300000	4.73272	3.07469	3.42558	3.74433
P49104	Ras-related protein Rab-2-B OS=Zea mays GN=RAB2B PE=2 SV=1	650000	560000	605000	0.509177	0.627558	1.4825	0.873079		P49104	Ras-related protein Rab-2-B OS=Zea mays GN=RAB2B PE=2 SV=1	795000	390000	1200000	2.89424	1.09012	0.775604	1.58665
B7F845	60S ribosomal protein L10a OS=Oryza sativa subsp. japonica GN=RPL10A PE=1 SV=1		0	0	0	0	0	0		B7F845	60S ribosomal protein L10a OS=Oryza sativa subsp. japonica GN=RPL10A PE=1 SV=1	0	0	0	0	0	0	0
Q9LD61	Aspartate carbamoyltransferase, chloroplastic OS=Oryza sativa subsp. japonica GN=PYRB PE=2 SV=1	1600000	1400000	390000	1.25336	1.56889	0.955663	1.25931		Q9LD61	Aspartate carbamoyltransferase, chloroplastic OS=Oryza sativa subsp. japonica GN=PYRB PE=2 SV=1	320000	640000	3400000	1.16498	1.78891	2.19754	1.71714
A1EA14	ATP synthase epsilon chain, chloroplastic OS=Agrostis stolonifera GN=atpE PE=3 SV=1	28000000	21000000	17000000	21.9338	23.5334	41.6571	29.0414		A1EA14	ATP synthase epsilon chain, chloroplastic OS=Agrostis stolonifera GN=atpE PE=3 SV=1	9600000	17000000	85000000	34.9493	47.5179	54.9386	45.8019
P81664	Phosphoribulokinase (Fragments) OS=Pinus pinaster PE=1 SV=1	220000000	180000000	46000000	172.337	201.715	112.719	162.257		P81664	Phosphoribulokinase (Fragments) OS=Pinus pinaster PE=1 SV=1	63000000	44000000	210000000	229.355	122.987	135.731	162.691
P00070	Cytochrome c OS=Helianthus annuus GN=CYTC1 PE=1 SV=3	5600000	4400000	2400000	4.38676	4.93081	5.881	5.06619		P00070	Cytochrome c OS=Helianthus annuus GN=CYTC1 PE=1 SV=3	1600000	1900000	11000000	5.82488	5.31082	7.1097	6.0818
P02582	Actin-1 OS=Zea mays GN=ACT1 PE=3 SV=1	3800000	1100000	2450000	2.97673	1.2327	6.00352	3.40432		P02582	Actin-1 OS=Zea mays GN=ACT1 PE=3 SV=1	0	0	0	0	0	0	0
Q40787	Ras-related protein Rab7 OS=Cenchrus ciliaris PE=2 SV=1	2100000	560000	1330000	1.64503	0.627558	3.25905	1.84388		Q40787	Ras-related protein Rab7 OS=Cenchrus ciliaris PE=2 SV=1	47000	610000	4400000	0.171106	1.70505	2.84388	1.57335
P29036	Ferritin-1, chloroplastic OS=Zea mays GN=FER1 PE=1 SV=2	5800000	2300000	4050000	4.54343	2.57747	9.92419	5.68169		P29036	Ferritin-1, chloroplastic OS=Zea mays GN=FER1 PE=1 SV=2	85000	700000	6800000	0.309447	1.95662	4.39509	2.22038
P13192	Photosystem I reaction center subunit III, chloroplastic OS=Hordeum vulgare GN=PSAF PE=1 SV=2	89000000	31000000	740000	69.7181	34.7398	1.81331	35.4237		P13192	Photosystem I reaction center subunit III, chloroplastic OS=Hordeum vulgare GN=PSAF PE=1 SV=2	3900000	34950000	66000000	14.1981	97.6912	42.6582	51.5158
A2Z3I9	Proteasome subunit alpha type-7-B OS=Oryza sativa subsp. indica GN=PAD1 PE=2 SV=1	2000000	440000	1220000	1.5667	0.493081	2.98951	1.6831		A2Z3I9	Proteasome subunit alpha type-7-B OS=Oryza sativa subsp. indica GN=PAD1 PE=2 SV=1	855000	210000	1500000	3.11267	0.586986	0.969505	1.55639
A2Y7R5	GTP-binding nuclear protein Ran-2 OS=Oryza sativa subsp. indica GN=RAN2 PE=2 SV=1	6100000	2500000	4300000	4.77843	2.8016	10.5368	6.03894		A2Y7R5	GTP-binding nuclear protein Ran-2 OS=Oryza sativa subsp. indica GN=RAN2 PE=2 SV=1	560000	1400000	5300000	2.03871	3.91324	3.42558	3.12584
Q9FE01	L-ascorbate peroxidase 2, cytosolic OS=Oryza sativa subsp. japonica GN=APX2 PE=1 SV=1	17000000	1100000	9050000	13.3169	1.2327	22.1763	12.242		Q9FE01	L-ascorbate peroxidase 2, cytosolic OS=Oryza sativa subsp. japonica GN=APX2 PE=1 SV=1	2100000	2000000	7000000	7.64516	5.59034	4.52436	5.91995
O81372	Nucleoside diphosphate kinase 1 OS=Mesembryanthemum crystallinum GN=NDKP1 PE=2 SV=1	5500000	4300000	1200000	4.30842	4.81875	2.9405	4.02256		O81372	Nucleoside diphosphate kinase 1 OS=Mesembryanthemum crystallinum GN=NDKP1 PE=2 SV=1	520000	560000	12000000	1.89309	1.56529	7.75604	3.73814
P00056	Cytochrome c OS=Zea mays PE=1 SV=1	12000000	14000000	12000000	9.40019	15.6889	29.405	18.1647		P00056	Cytochrome c OS=Zea mays PE=1 SV=1	0	0	0	0	0	0	0
Q53LQ0	Protein disulfide isomerase-like 1-1 OS=Oryza sativa subsp. japonica GN=PDIL1-1 PE=2 SV=1	4100000	3100000	3600000	3.21173	3.47398	8.8215	5.16907		Q53LQ0	Protein disulfide isomerase-like 1-1 OS=Oryza sativa subsp. japonica GN=PDIL1-1 PE=2 SV=1	720000	410000	2600000	2.6212	1.14602	1.68048	1.8159
Q9AQU5	Aquaporin PIP1-3/PIP1-4 OS=Zea mays GN=PIP1-3 PE=2 SV=1	3400000	3500000	1400000	2.66339	3.92223	3.43058	3.33874		Q9AQU5	Aquaporin PIP1-3/PIP1-4 OS=Zea mays GN=PIP1-3 PE=2 SV=1	1900000	1200000	4200000	6.91705	3.3542	2.71461	4.32862
P0DKK8	40S ribosomal protein S10-1 OS=Oryza sativa subsp. japonica GN=RPS10-1 PE=2 SV=1	4300000	2000000	360000	3.3684	2.24128	0.88215	2.16394		P0DKK8	40S ribosomal protein S10-1 OS=Oryza sativa subsp. japonica GN=RPS10-1 PE=2 SV=1	0	0	0	0	0	0	0
Q6Z1G7	Pyruvate dehydrogenase E1 component subunit beta-1, mitochondrial OS=Oryza sativa subsp. japonica GN=Os08g0536000 PE=2 SV=1	6100000	5500000	1200000	4.77843	6.16351	2.9405	4.62748		Q6Z1G7	Pyruvate dehydrogenase E1 component subunit beta-1, mitochondrial OS=Oryza sativa subsp. japonica GN=Os08g0536000 PE=2 SV=1	0	0	0	0	0	0	0
Q75IM9	Isovaleryl-CoA dehydrogenase, mitochondrial OS=Oryza sativa subsp. japonica GN=Os05g0125500 PE=2 SV=2	3500000	3700000	510000	2.74172	4.14636	1.24971	2.7126		Q75IM9	Isovaleryl-CoA dehydrogenase, mitochondrial OS=Oryza sativa subsp. japonica GN=Os05g0125500 PE=2 SV=2	160000	1680000	3200000	0.582488	4.69588	2.06828	2.44888
P27777	16.9 kDa class I heat shock protein 1 OS=Oryza sativa subsp. japonica GN=HSP16.9A PE=1 SV=1	21000000	28000000	4900000	16.4503	31.3779	12.007	19.9451		P27777	16.9 kDa class I heat shock protein 1 OS=Oryza sativa subsp. japonica GN=HSP16.9A PE=1 SV=1	550000	420000	7900000	2.0023	1.17397	5.10606	2.76078
P0C8Y9	Proteasome subunit alpha type-4-2 OS=Oryza sativa subsp. indica GN=OsI_021067 PE=1 SV=1	610000	370000	490000	0.477843	0.414636	1.2007	0.697728		P0C8Y9	Proteasome subunit alpha type-4-2 OS=Oryza sativa subsp. indica GN=OsI_021067 PE=1 SV=1	140000	480000	820000	0.509677	1.34168	0.529996	0.793785
P40392	Ras-related protein RIC1 OS=Oryza sativa subsp. japonica GN=RIC1 PE=2 SV=2	0	0	0	0	0	0	0		P40392	Ras-related protein RIC1 OS=Oryza sativa subsp. japonica GN=RIC1 PE=2 SV=2	0	0	0	0	0	0	0
Q9SDL8	Fructose-1,6-bisphosphatase, cytosolic OS=Oryza coarctata PE=2 SV=1	9800000	6100000	7950000	7.67682	6.83589	19.4808	11.3312		Q9SDL8	Fructose-1,6-bisphosphatase, cytosolic OS=Oryza coarctata PE=2 SV=1	1000000	4500000	8000000	3.64055	12.5783	5.17069	7.12983
P12328	Chlorophyll a-b binding protein of LHCII type I, chloroplastic OS=Lemna gibba PE=3 SV=1	0	0	0	0	0	0	0		P12328	Chlorophyll a-b binding protein of LHCII type I, chloroplastic OS=Lemna gibba PE=3 SV=1	0	0	0	0	0	0	0
Q6ZFT5	Ribose-phosphate pyrophosphokinase 4 OS=Oryza sativa subsp. japonica GN=Os02g0714600 PE=2 SV=1	1800000	1100000	1450000	1.41003	1.2327	3.5531	2.06528		Q6ZFT5	Ribose-phosphate pyrophosphokinase 4 OS=Oryza sativa subsp. japonica GN=Os02g0714600 PE=2 SV=1	0	0	0	0	0	0	0
O48557	60S ribosomal protein L17 OS=Zea mays GN=RPL17 PE=2 SV=1	0	0	0	0	0	0	0		O48557	60S ribosomal protein L17 OS=Zea mays GN=RPL17 PE=2 SV=1	0	0	0	0	0	0	0
Q9FZ48	Ubiquitin-conjugating enzyme E2 36 OS=Arabidopsis thaliana GN=UBC36 PE=1 SV=1	1500000	1500000	790000	1.17502	1.68096	1.93583	1.59727		Q9FZ48	Ubiquitin-conjugating enzyme E2 36 OS=Arabidopsis thaliana GN=UBC36 PE=1 SV=1	950000	1000000	3300000	3.45852	2.79517	2.13291	2.79553
O65101	Photosystem I reaction center subunit VI, chloroplastic OS=Zea mays GN=PSAH PE=2 SV=1	24000000	14000000	590000	18.8004	15.6889	1.44575	11.9784		O65101	Photosystem I reaction center subunit VI, chloroplastic OS=Zea mays GN=PSAH PE=2 SV=1	1600000	370000	39000000	5.82488	1.03421	25.2071	10.6887
P36886	Photosystem I reaction center subunit psaK, chloroplastic OS=Hordeum vulgare GN=PSAK PE=1 SV=1	34000000	23000000	16000000	26.6339	25.7747	39.2067	30.5384		P36886	Photosystem I reaction center subunit psaK, chloroplastic OS=Hordeum vulgare GN=PSAK PE=1 SV=1	9300000	13000000	47000000	33.8571	36.3372	30.3778	33.524
Q9S829	NAD(P)H-quinone oxidoreductase subunit O, chloroplastic OS=Arabidopsis thaliana GN=ndhO PE=2 SV=1	8200000	7200000	2300000	6.42346	8.0686	5.63596	6.70934		Q9S829	NAD(P)H-quinone oxidoreductase subunit O, chloroplastic OS=Arabidopsis thaliana GN=ndhO PE=2 SV=1	2200000	4200000	9000000	8.00921	11.7397	5.81703	8.52198
P93258	Superoxide dismutase [Cu-Zn] 1 OS=Mesembryanthemum crystallinum GN=SODCC.1 PE=2 SV=1	1100000	4500000	5300000	0.861684	5.04287	12.9872	6.29726		P93258	Superoxide dismutase [Cu-Zn] 1 OS=Mesembryanthemum crystallinum GN=SODCC.1 PE=2 SV=1	1760000	420000	3100000	6.40737	1.17397	2.00364	3.19499
P34924	Glyceraldehyde-3-phosphate dehydrogenase, cytosolic OS=Pinus sylvestris GN=GAPC PE=2 SV=1	1500000	1200000	1350000	1.17502	1.34477	3.30806	1.94262		P34924	Glyceraldehyde-3-phosphate dehydrogenase, cytosolic OS=Pinus sylvestris GN=GAPC PE=2 SV=1	0	0	0	0	0	0	0
P28186	Ras-related protein RABE1c OS=Arabidopsis thaliana GN=RABE1C PE=1 SV=1	0	0	0	0	0	0	0		P28186	Ras-related protein RABE1c OS=Arabidopsis thaliana GN=RABE1C PE=1 SV=1	1200000	2800000	2000000	4.36866	7.82647	1.29267	4.49594
Q9SIP7	40S ribosomal protein S3-1 OS=Arabidopsis thaliana GN=RPS3A PE=1 SV=1	9000000	8300000	730000	7.05014	9.3013	1.7888	6.04675		Q9SIP7	40S ribosomal protein S3-1 OS=Arabidopsis thaliana GN=RPS3A PE=1 SV=1	3000000	2000000	15000000	10.9217	5.59034	9.69505	8.73568
Q6ESF0	Germin-like protein 2-4 OS=Oryza sativa subsp. japonica GN=Os02g0532500 PE=2 SV=1	4900000	2800000	860000	3.83841	3.13779	2.10736	3.02785		Q6ESF0	Germin-like protein 2-4 OS=Oryza sativa subsp. japonica GN=Os02g0532500 PE=2 SV=1	950000	2000000	6000000	3.45852	5.59034	3.87802	4.30896
P93554	Nucleoside diphosphate kinase 1 OS=Saccharum officinarum GN=NDPK1 PE=1 SV=1	12000000	4400000	8200000	9.40019	4.93081	20.0934	11.4748		P93554	Nucleoside diphosphate kinase 1 OS=Saccharum officinarum GN=NDPK1 PE=1 SV=1	5000000	5700000	13000000	18.2028	15.9325	8.40238	14.1792
Q07760	60S ribosomal protein L23 OS=Nicotiana tabacum GN=RPL23 PE=2 SV=1	0	0	0	0	0	0	0		Q07760	60S ribosomal protein L23 OS=Nicotiana tabacum GN=RPL23 PE=2 SV=1	0	0	0	0	0	0	0
A2XID3	Allene oxide cyclase, chloroplastic OS=Oryza sativa subsp. indica GN=AOC PE=2 SV=1	2800000	4100000	3450000	2.19338	4.59462	8.45394	5.08064		A2XID3	Allene oxide cyclase, chloroplastic OS=Oryza sativa subsp. indica GN=AOC PE=2 SV=1	870000	84000	6200000	3.16728	0.234794	4.00729	2.46979
P19656	Non-specific lipid-transfer protein OS=Zea mays PE=1 SV=1	7400000	5500000	1300000	5.79679	6.16351	3.18554	5.04861		P19656	Non-specific lipid-transfer protein OS=Zea mays PE=1 SV=1	4900000	10950000	17000000	17.8387	30.6071	10.9877	19.8112
Q9AT35	60S ribosomal protein L23a OS=Daucus carota GN=RPL23A PE=2 SV=1	0	0	0	0	0	0	0		Q9AT35	60S ribosomal protein L23a OS=Daucus carota GN=RPL23A PE=2 SV=1	0	0	0	0	0	0	0
P46465	26S proteasome regulatory subunit 6A homolog OS=Oryza sativa subsp. japonica GN=TBP1 PE=2 SV=2	0	0	0	0	0	0	0		P46465	26S proteasome regulatory subunit 6A homolog OS=Oryza sativa subsp. japonica GN=TBP1 PE=2 SV=2	0	0	0	0	0	0	0
O49513	Ras-related protein RABA1e OS=Arabidopsis thaliana GN=RABA1E PE=2 SV=1	6300000	2700000	1500000	4.9351	3.02572	3.67563	3.87882		O49513	Ras-related protein RABA1e OS=Arabidopsis thaliana GN=RABA1E PE=2 SV=1	1005000	310000	1700000	3.65875	0.866502	1.09877	1.87468
O64464	Proteasome subunit beta type-1 OS=Oryza sativa subsp. japonica GN=PBF1 PE=2 SV=1	2000000	1300000	150000	1.5667	1.45683	0.367563	1.13036		O64464	Proteasome subunit beta type-1 OS=Oryza sativa subsp. japonica GN=PBF1 PE=2 SV=1	410000	1405000	2400000	1.49263	3.92721	1.55121	2.32368
O50003	60S ribosomal protein L12 OS=Prunus armeniaca GN=RPL12 PE=2 SV=1	18000000	24000000	21000000	14.1003	26.8953	51.4588	30.8181		O50003	60S ribosomal protein L12 OS=Prunus armeniaca GN=RPL12 PE=2 SV=1	5800000	23400000	41000000	21.1152	65.407	26.4998	37.674
P42794	60S ribosomal protein L11-2 OS=Arabidopsis thaliana GN=RPL11B PE=2 SV=2	0	0	0	0	0	0	0		P42794	60S ribosomal protein L11-2 OS=Arabidopsis thaliana GN=RPL11B PE=2 SV=2	0	0	0	0	0	0	0
P17093	40S ribosomal protein S11 OS=Glycine max GN=RPS11 PE=2 SV=2	0	0	0	0	0	0	0		P17093	40S ribosomal protein S11 OS=Glycine max GN=RPS11 PE=2 SV=2	0	0	0	0	0	0	0
Q9ZP21	Thioredoxin M-type, chloroplastic OS=Triticum aestivum PE=2 SV=1	9000000	21000000	1100000	7.05014	23.5334	2.69546	11.093		Q9ZP21	Thioredoxin M-type, chloroplastic OS=Triticum aestivum PE=2 SV=1	2100000	3900000	24000000	7.64516	10.9012	15.5121	11.3528
A2Y5G8	Probable histone H2A.4 OS=Oryza sativa subsp. indica GN=OsI_019561 PE=3 SV=1	0	0	0	0	0	0	0		A2Y5G8	Probable histone H2A.4 OS=Oryza sativa subsp. indica GN=OsI_019561 PE=3 SV=1	0	0	0	0	0	0	0
Q84Q72	18.1 kDa class I heat shock protein OS=Oryza sativa subsp. japonica GN=HSP18.1 PE=2 SV=1	1500000	1500000	1500000	1.17502	1.68096	3.67563	2.1772		Q84Q72	18.1 kDa class I heat shock protein OS=Oryza sativa subsp. japonica GN=HSP18.1 PE=2 SV=1	0	0	0	0	0	0	0
P27880	18.2 kDa class I heat shock protein OS=Medicago sativa GN=HSP18.2 PE=2 SV=1	150000	1100000	625000	0.117502	1.2327	1.53151	0.960572		P27880	18.2 kDa class I heat shock protein OS=Medicago sativa GN=HSP18.2 PE=2 SV=1	0	0	0	0	0	0	0
O24461	Ras-related protein Rab7 OS=Prunus armeniaca PE=2 SV=1	0	0	0	0	0	0	0		O24461	Ras-related protein Rab7 OS=Prunus armeniaca PE=2 SV=1	200000	490000	345000	0.72811	1.36963	0.222986	0.773576
O22655	Profilin-4 OS=Zea mays GN=PRO4 PE=1 SV=1	7000000	4600000	170000	5.48345	5.15494	0.416571	3.68498		O22655	Profilin-4 OS=Zea mays GN=PRO4 PE=1 SV=1	1100000	380000	8800000	4.00461	1.06216	5.68776	3.58484
P80269	NADH dehydrogenase [ubiquinone] iron-sulfur protein 8, mitochondrial OS=Solanum tuberosum PE=1 SV=2	0	0	0	0	0	0	0		P80269	NADH dehydrogenase [ubiquinone] iron-sulfur protein 8, mitochondrial OS=Solanum tuberosum PE=1 SV=2	0	0	0	0	0	0	0
P08903	Histone H3.2 OS=Encephalartos altensteinii PE=1 SV=2	6700000	7400000	1400000	5.24844	8.29272	3.43058	5.65725		P08903	Histone H3.2 OS=Encephalartos altensteinii PE=1 SV=2	1800000	6900000	12000000	6.55299	19.2867	7.75604	11.1986
Q99070	Glycine-rich RNA-binding protein 2 OS=Sorghum bicolor GN=GRP2 PE=2 SV=1	20000000	22000000	17000000	15.667	24.654	41.6571	27.326		Q99070	Glycine-rich RNA-binding protein 2 OS=Sorghum bicolor GN=GRP2 PE=2 SV=1	12000000	22000000	60000000	43.6866	61.4937	38.7802	47.9868
P00865	Ribulose bisphosphate carboxylase small chain 1, chloroplastic OS=Glycine max GN=RBCS-1 PE=3 SV=1	710000000	330000000	270000000	556.178	369.811	661.613	529.2		P00865	Ribulose bisphosphate carboxylase small chain 1, chloroplastic OS=Glycine max GN=RBCS-1 PE=3 SV=1	140000000	140000000	1400000000	509.677	391.324	904.871	601.957
Q8S857	Probable histone H2A variant 2 OS=Oryza sativa subsp. japonica GN=Os10g0418000 PE=2 SV=1	36000000	66000000	450000	28.2006	73.9621	1.10269	34.4218		Q8S857	Probable histone H2A variant 2 OS=Oryza sativa subsp. japonica GN=Os10g0418000 PE=2 SV=1	7500000	13000000	60000000	27.3041	36.3372	38.7802	34.1405
Q41764	Actin-depolymerizing factor 3 OS=Zea mays GN=ADF3 PE=1 SV=1	0	0	0	0	0	0	0		Q41764	Actin-depolymerizing factor 3 OS=Zea mays GN=ADF3 PE=1 SV=1	990000	1700000	1345000	3.60415	4.75179	0.869323	3.07509
Q2QPG9	Probable histone H2AXb OS=Oryza sativa subsp. japonica GN=Os12g0530000 PE=2 SV=1	0	0	0	0	0	0	0		Q2QPG9	Probable histone H2AXb OS=Oryza sativa subsp. japonica GN=Os12g0530000 PE=2 SV=1	0	0	0	0	0	0	0
Q09ME8	Photosystem II reaction center protein H OS=Citrus sinensis GN=psbH PE=3 SV=1	0	0	0	0	0	0	0		Q09ME8	Photosystem II reaction center protein H OS=Citrus sinensis GN=psbH PE=3 SV=1	0	0	0	0	0	0	0
Q84VG0	Probable calcium-binding protein CML7 OS=Oryza sativa subsp. japonica GN=CML7 PE=2 SV=1	1800000	1300000	820000	1.41003	1.45683	2.00934	1.6254		Q84VG0	Probable calcium-binding protein CML7 OS=Oryza sativa subsp. japonica GN=CML7 PE=2 SV=1	740000	1500000	4400000	2.69401	4.19275	2.84388	3.24355
P27063	Ribulose bisphosphate carboxylase large chain (Fragment) OS=Capsicum annuum GN=rbcL PE=1 SV=1	89000000	85000000	4400000	69.7181	95.2543	10.7818	58.5847		P27063	Ribulose bisphosphate carboxylase large chain (Fragment) OS=Capsicum annuum GN=rbcL PE=1 SV=1	2600000	520000	59000000	9.46543	1.45349	38.1339	16.3509
P46252	60S acidic ribosomal protein P2A OS=Zea mays GN=RPP2A PE=1 SV=3	1400000	1000000	370000	1.09669	1.12064	0.906654	1.04133		P46252	60S acidic ribosomal protein P2A OS=Zea mays GN=RPP2A PE=1 SV=3	1000000	480000	1500000	3.64055	1.34168	0.969505	1.98391
A1E9M6	30S ribosomal protein S8, chloroplastic OS=Hordeum vulgare GN=rps8 PE=3 SV=1	0	0	0	0	0	0	0		A1E9M6	30S ribosomal protein S8, chloroplastic OS=Hordeum vulgare GN=rps8 PE=3 SV=1	0	0	0	0	0	0	0
Q949H0	40S ribosomal protein S7 OS=Hordeum vulgare GN=RPS7 PE=2 SV=1	0	0	0	0	0	0	0		Q949H0	40S ribosomal protein S7 OS=Hordeum vulgare GN=RPS7 PE=2 SV=1	0	0	0	0	0	0	0
Q9LST6	Proteasome subunit beta type-2 OS=Oryza sativa subsp. japonica GN=PBD1 PE=2 SV=2	0	0	0	0	0	0	0		Q9LST6	Proteasome subunit beta type-2 OS=Oryza sativa subsp. japonica GN=PBD1 PE=2 SV=2	0	0	0	0	0	0	0
Q9AT34	40S ribosomal protein S15a OS=Daucus carota GN=RPS15A PE=2 SV=3	5000000	2900000	820000	3.91675	3.24985	2.00934	3.05865		Q9AT34	40S ribosomal protein S15a OS=Daucus carota GN=RPS15A PE=2 SV=3	4900000	1800000	8000000	17.8387	5.0313	5.17069	9.3469
O04267	GTP-binding protein SAR1B OS=Brassica campestris GN=SAR1B PE=2 SV=1	2300000	1900000	350000	1.8017	2.12921	0.857646	1.59619		O04267	GTP-binding protein SAR1B OS=Brassica campestris GN=SAR1B PE=2 SV=1	810000	260000	4700000	2.94885	0.726744	3.03778	2.23779
Q08275	17.0 kDa class II heat shock protein OS=Zea mays GN=HSP18 PE=2 SV=1	4600000	4600000	1400000	3.60341	5.15494	3.43058	4.06298		Q08275	17.0 kDa class II heat shock protein OS=Zea mays GN=HSP18 PE=2 SV=1	2960000	920000	5000000	10.776	2.57156	3.23168	5.52642
P08528	50S ribosomal protein L16, chloroplastic OS=Zea mays GN=rpl16 PE=3 SV=3	0	0	0	0	0	0	0		P08528	50S ribosomal protein L16, chloroplastic OS=Zea mays GN=rpl16 PE=3 SV=3	530000	340000	720000	1.92949	0.950358	0.465362	1.11507
P55240	Glucose-1-phosphate adenylyltransferase small subunit (Fragment) OS=Zea mays GN=GLG1 PE=2 SV=1	0	0	0	0	0	0	0		P55240	Glucose-1-phosphate adenylyltransferase small subunit (Fragment) OS=Zea mays GN=GLG1 PE=2 SV=1	1560000	320000	2800000	5.67926	0.894454	1.80974	2.79449
Q6EN80	30S ribosomal protein S19, chloroplastic OS=Oryza nivara GN=rps19-A PE=3 SV=1	1800000	1055000	310000	1.41003	1.18227	0.759629	1.11731		Q6EN80	30S ribosomal protein S19, chloroplastic OS=Oryza nivara GN=rps19-A PE=3 SV=1	2180000	760000	3600000	7.9364	2.12433	2.32681	4.12918
Q9AY76	Actin-depolymerizing factor 2 OS=Oryza sativa subsp. japonica GN=ADF2 PE=2 SV=1	81000	190000	135500	0.0634513	0.212921	0.332031	0.202801		Q9AY76	Actin-depolymerizing factor 2 OS=Oryza sativa subsp. japonica GN=ADF2 PE=2 SV=1	0	0	0	0	0	0	0
Q43199	Adenine phosphoribosyltransferase 1 OS=Triticum aestivum GN=APT1 PE=2 SV=1	0	0	0	0	0	0	0		Q43199	Adenine phosphoribosyltransferase 1 OS=Triticum aestivum GN=APT1 PE=2 SV=1	0	0	0	0	0	0	0
P27788	Ferredoxin-3, chloroplastic OS=Zea mays GN=FDX3 PE=1 SV=1	0	0	0	0	0	0	0		P27788	Ferredoxin-3, chloroplastic OS=Zea mays GN=FDX3 PE=1 SV=1	0	0	0	0	0	0	0
Q9STG6	Deoxyuridine 5'-triphosphate nucleotidohydrolase OS=Arabidopsis thaliana GN=DUT PE=1 SV=1	0	0	0	0	0	0	0		Q9STG6	Deoxyuridine 5'-triphosphate nucleotidohydrolase OS=Arabidopsis thaliana GN=DUT PE=1 SV=1	0	0	0	0	0	0	0
P47903	40S ribosomal protein S27 OS=Chlamydomonas reinhardtii GN=RPS27 PE=3 SV=1	745000	1000000	490000	0.583595	1.12064	1.2007	0.968313		P47903	40S ribosomal protein S27 OS=Chlamydomonas reinhardtii GN=RPS27 PE=3 SV=1	0	0	0	0	0	0	0
		12765696000	8923485000	4080938500								2746837000	3577601000	15471815000
